# Supplementary material
Source: PubMed Central journal article supplement (PMC4375868)
Supplement: rspb20142903supp1.pdf [file rspb20142903supp1.pdf]

**Table S1:** The area under the curve (AUC) of the receiver operating characteristic, provided for each species and each modelling method for each of the two GCMs (GFDL and CCM1): discriminant analysis (DA), minimum distance (MD), Random Forests (RF), and the averaged ensemble method (Ens). AUCs are also noted for model projections based on the 1961-1990 observed climate (Modern). The number of palaeoecological records used for the validation is also reported (N). CCM1 projections were validated with data from 6,000, 11,000, 14,000, 16,000, and 21,000 years ago. GFDL projections were validated with data from 6,000, 9,000, 16,000, and 21,000 years ago.

| Species                | Modern |             |             |             |             | CCM1 Model |             |             |             |             | GFDL Model |             |             |             |             |
|------------------------|--------|-------------|-------------|-------------|-------------|------------|-------------|-------------|-------------|-------------|------------|-------------|-------------|-------------|-------------|
|                        | N      | DA          | MD          | RF          | Ens         | N          | DA          | MD          | RF          | Ens         | N          | DA          | MD          | RF          | Ens         |
| <i>A. amabilis</i>     | 1615   | 0.93        | 0.83        | 0.93        | 0.97        | 3          | 0.97        | 0.79        | 0.63        | 0.95        | 3          | 0.97        | 0.79        | 0.80        | 0.97        |
| <i>A. lasiocarpa</i>   | 10804  | 0.82        | 0.72        | 0.82        | 0.86        | 83         | 0.63        | 0.66        | 0.66        | 0.70        | 81         | 0.69        | 0.68        | 0.69        | 0.78        |
| <i>A. procera</i>      | 82     | 0.83        | 0.68        | 0.85        | 0.91        | 1          | 0.49        | 0.49        | 0.49        | 0.48        | 1          | 1.00        | 0.99        | 1.00        | 1.00        |
| <i>A. macrophyllum</i> | 437    | 0.95        | 0.94        | 0.96        | 0.97        | 9          | 0.70        | 0.69        | 0.69        | 0.69        | 11         | 0.75        | 0.74        | 0.73        | 0.74        |
| <i>A. rubra</i>        | 715    | 0.96        | 0.94        | 0.96        | 0.97        | 24         | 0.80        | 0.73        | 0.76        | 0.82        | 22         | 0.82        | 0.80        | 0.81        | 0.81        |
| <i>C. decurrens</i>    | 561    | 0.96        | 0.88        | 0.98        | 0.99        | 2          | 0.99        | 0.74        | 0.74        | 0.99        | 3          | 1.00        | 0.65        | 0.99        | 1.00        |
| <i>C. nootkatensis</i> | 707    | 0.94        | 0.93        | 0.94        | 0.97        | 64         | 0.62        | 0.62        | 0.64        | 0.67        | 65         | 0.69        | 0.61        | 0.61        | 0.72        |
| <i>L. occidentalis</i> | 821    | 0.86        | 0.67        | 0.87        | 0.92        | 6          | 0.66        | 0.57        | 0.65        | 0.73        | 7          | 0.63        | 0.70        | 0.84        | 0.91        |
| <i>P. engelmannii</i>  | 6223   | 0.80        | 0.69        | 0.81        | 0.86        | 87         | 0.62        | 0.60        | 0.63        | 0.70        | 79         | 0.66        | 0.60        | 0.67        | 0.76        |
| <i>P. glauca</i>       | 7115   | 0.87        | 0.83        | 0.88        | 0.90        | 108        | 0.68        | 0.64        | 0.72        | 0.73        | 145        | 0.66        | 0.61        | 0.69        | 0.69        |
| <i>P. mariana</i>      | 2922   | 0.88        | 0.80        | 0.89        | 0.89        | 87         | 0.70        | 0.66        | 0.76        | 0.77        | 99         | 0.73        | 0.65        | 0.73        | 0.75        |
| <i>P. sitchensis</i>   | 1016   | 0.94        | 0.90        | 0.95        | 0.98        | 55         | 0.74        | 0.80        | 0.76        | 0.83        | 56         | 0.74        | 0.77        | 0.74        | 0.81        |
| <i>P. albicaulis</i>   | 1038   | 0.77        | 0.70        | 0.77        | 0.85        | 82         | 0.58        | 0.54        | 0.58        | 0.63        | 61         | 0.63        | 0.63        | 0.67        | 0.75        |
| <i>P. contorta</i>     | 11275  | 0.81        | 0.72        | 0.82        | 0.83        | 234        | 0.64        | 0.63        | 0.63        | 0.69        | 219        | 0.62        | 0.66        | 0.69        | 0.73        |
| <i>P. edulis</i>       | 2836   | 0.80        | 0.61        | 0.83        | 0.90        | 44         | 0.61        | 0.51        | 0.55        | 0.63        | 45         | 0.63        | 0.53        | 0.59        | 0.70        |
| <i>P. monticola</i>    | 820    | 0.87        | 0.74        | 0.89        | 0.92        | 28         | 0.62        | 0.61        | 0.59        | 0.69        | 24         | 0.62        | 0.63        | 0.67        | 0.68        |
| <i>P. ponderosa</i>    | 3967   | 0.83        | 0.76        | 0.88        | 0.91        | 55         | 0.68        | 0.59        | 0.68        | 0.72        | 54         | 0.67        | 0.62        | 0.67        | 0.71        |
| <i>P. tremuloides</i>  | 7241   | 0.82        | 0.78        | 0.83        | 0.85        | 33         | 0.57        | 0.55        | 0.55        | 0.58        | 24         | 0.60        | 0.59        | 0.60        | 0.61        |
| <i>P. menziesii</i>    | 8808   | 0.85        | 0.79        | 0.88        | 0.90        | 306        | 0.66        | 0.66        | 0.68        | 0.72        | 320        | 0.73        | 0.72        | 0.77        | 0.80        |
| <i>T. plicata</i>      | 3798   | 0.93        | 0.81        | 0.94        | 0.95        | 69         | 0.88        | 0.80        | 0.87        | 0.89        | 70         | 0.87        | 0.82        | 0.85        | 0.89        |
| <i>T. heterophylla</i> | 4860   | 0.93        | 0.87        | 0.95        | 0.97        | 164        | 0.84        | 0.77        | 0.82        | 0.87        | 167        | 0.84        | 0.80        | 0.84        | 0.87        |
| <i>T. mertensiana</i>  | 1136   | 0.90        | 0.80        | 0.86        | 0.94        | 98         | 0.78        | 0.71        | 0.73        | 0.81        | 78         | 0.75        | 0.71        | 0.76        | 0.80        |
| <i>Average (n≤10)</i>  |        | <i>0.87</i> | <i>0.79</i> | <i>0.89</i> | <i>0.92</i> |            | <i>0.69</i> | <i>0.65</i> | <i>0.68</i> | <i>0.73</i> |            | <i>0.71</i> | <i>0.68</i> | <i>0.71</i> | <i>0.75</i> |
