# Supplementary material
Source: PubMed Central journal article supplement (PMC4375868)
Supplement: rspb20142903supp2.pdf [file rspb20142903supp2.pdf]

**Table S2:** Rate of representation (%) of each species for each identified region in figure 1 at the last glacial maximum 21,000 years before the present, as projected in the average of all model runs for both palaeoclimate simulations. Percentages <1% have been removed. The total count of species projected as present in a given region (of the 22 included species, where representation was  $\geq 1\%$ ) is also listed (Species count).

| Species                   | North coast |            |             |                | South coast |               |               |             | North interior basins |                |                 |            | South interior basins |          |                  |               |            |               |             |        |
|---------------------------|-------------|------------|-------------|----------------|-------------|---------------|---------------|-------------|-----------------------|----------------|-----------------|------------|-----------------------|----------|------------------|---------------|------------|---------------|-------------|--------|
|                           | Central AK  | Western AK | Haida Gwaii | Vancouver Isl. | CA Coast    | Klamath Mtns. | Sierra Nevada | S. CA Mtns. | Columbia Plateau      | Northern Basin | Snake R. Plains | Willamette | WY Basin              | AZ Mtns. | Colorado Plateau | Central Basin | NM Plateau | SW Tablelands | High Plains | Mexico |
| Mesic: coastal            |             |            |             |                |             |               |               |             |                       |                |                 |            |                       |          |                  |               |            |               |             |        |
| <i>A. amabilis</i>        | -           | -          | 16          | 7              | 3           | 28            | 11            | 3           | 6                     | 4              | 4               | 8          | 4                     | -        | -                | -             | 1          | -             | -           | 5      |
| <i>A. procera</i>         | -           | -          | -           | -              | 5           | 51            | 25            | 9           | -                     | -              | -               | -          | -                     | 1        | -                | 2             | -          | -             | -           | 7      |
| <i>A. macrophyllum</i>    | -           | -          | -           | -              | 27          | 24            | 25            | 12          | -                     | -              | -               | -          | -                     | -        | -                | -             | -          | -             | -           | 12     |
| <i>A. rubra</i>           | -           | -          | -           | -              | 46          | 25            | 14            | 4           | -                     | -              | -               | -          | -                     | 1        | 1                | 1             | -          | -             | -           | 8      |
| <i>C. decurrens</i>       | -           | -          | -           | -              | 13          | 15            | 23            | 26          | -                     | 1              | -               | -          | -                     | 4        | -                | 3             | -          | -             | -           | 17     |
| <i>C. nootkatensis</i>    | -           | -          | 37          | 7              | 15          | 25            | 2             | 3           | -                     | -              | -               | -          | -                     | -        | -                | -             | -          | -             | -           | 11     |
| <i>P. sitchensis</i>      | -           | -          | 9           | 4              | 51          | 21            | 3             | 1           | -                     | -              | -               | -          | 1                     | -        | -                | -             | 1          | 1             | 1           | 7      |
| Mesic: coastal & interior |             |            |             |                |             |               |               |             |                       |                |                 |            |                       |          |                  |               |            |               |             |        |
| <i>P. monticola</i>       | -           | -          | -           | -              | 12          | 30            | 26            | 12          | 2                     | 3              | 1               | 2          | 1                     | 3        | 1                | 2             | -          | -             | -           | 5      |
| <i>P. menziesii</i>       | -           | -          | -           | -              | 13          | 13            | 11            | 9           | -                     | 2              | 1               | 1          | 1                     | 9        | 5                | 6             | 3          | 12            | 3           | 11     |
| <i>T. plicata</i>         | -           | -          | 9           | 4              | 18          | 33            | 9             | 3           | -                     | -              | -               | -          | -                     | 1        | -                | -             | -          | 14            | -           | 9      |
| <i>T. heterophylla</i>    | -           | -          | 11          | 5              | 26          | 30            | 7             | 2           | 2                     | 1              | 1               | 3          | 1                     | -        | -                | -             | -          | 2             | -           | 9      |
| <i>T. mertensiana</i>     | -           | -          | 2           | 1              | 7           | 48            | 28            | 8           | -                     | 1              | -               | -          | -                     | 1        | -                | 1             | -          | -             | -           | 3      |
| Boreal & sub-boreal       |             |            |             |                |             |               |               |             |                       |                |                 |            |                       |          |                  |               |            |               |             |        |
| <i>P. glauca</i>          | -           | 19         | 7           | 7              | -           | -             | -             | -           | -                     | -              | -               | -          | 2                     | -        | 1                | 1             | 1          | 15            | 47          | -      |
| <i>P. mariana</i>         | -           | 18         | 17          | 17             | -           | -             | -             | -           | -                     | -              | -               | -          | 1                     | -        | -                | -             | 1          | 1             | 43          | -      |
| <i>P. contorta</i>        | 3           | 3          | 5           | 4              | 5           | 10            | 8             | 5           | 3                     | 3              | 3               | 3          | 5                     | 4        | 6                | 7             | 8          | 5             | 9           | 1      |
| <i>P. tremuloides</i>     | -           | 1          | 2           | 2              | -           | 1             | -             | 2           | 1                     | 1              | 1               | -          | 1                     | 18       | 10               | 10            | 5          | 21            | 20          | 4      |

Continued on next page

Table S2 – continued from previous page

| Species                         | North coast |            |             |                | South coast |               |               |             | North interior basins |                |                 |            |          | South interior basins |                  |               |            |               |             |        |
|---------------------------------|-------------|------------|-------------|----------------|-------------|---------------|---------------|-------------|-----------------------|----------------|-----------------|------------|----------|-----------------------|------------------|---------------|------------|---------------|-------------|--------|
|                                 | Central AK  | Western AK | Haida Gwaii | Vancouver Isl. | CA Coast    | Klamath Mtns. | Sierra Nevada | S. CA Mtns. | Columbia Plateau      | Northern Basin | Snake R. Plains | Willamette | WY Basin | AZ Mtns.              | Colorado Plateau | Central Basin | NM Plateau | SW Tablelands | High Plains | Mexico |
| Sub-alpine                      |             |            |             |                |             |               |               |             |                       |                |                 |            |          |                       |                  |               |            |               |             |        |
| <i>A. lasiocarpa</i>            | 5           | 6          | 1           | -              | -           | 5             | 2             | 1           | 9                     | 9              | 8               | 10         | 9        | 3                     | 6                | 4             | 9          | 5             | 7           | 1      |
| <i>P. engelmannii</i>           | 3           | 3          | -           | -              | -           | 1             | 1             | 2           | 2                     | 2              | 2               | 2          | 2        | 20                    | 14               | 13            | 10         | 13            | 8           | 2      |
| <i>P. albicaulis</i>            | 1           | 2          | -           | -              | 4           | 7             | 7             | 7           | 10                    | 10             | 8               | 12         | 7        | 3                     | 4                | 3             | 4          | 8             | 3           | -      |
| Xeric & sub-xeric               |             |            |             |                |             |               |               |             |                       |                |                 |            |          |                       |                  |               |            |               |             |        |
| <i>L. occidentalis</i>          | -           | -          | -           | -              | 1           | 3             | 10            | 15          | -                     | 1              | -               | -          | -        | 26                    | 7                | 9             | -          | 16            | -           | 12     |
| <i>P. edulis</i>                | -           | -          | -           | -              | -           | -             | -             | 3           | -                     | -              | -               | -          | -        | 24                    | 3                | 2             | 1          | 16            | -           | 51     |
| <i>P. ponderosa</i>             | -           | -          | -           | -              | 5           | 2             | 6             | 13          | -                     | -              | -               | -          | -        | 20                    | 3                | 9             | 1          | 23            | 2           | 16     |
| <i>Species Count (rate ≤ 1)</i> | 4           | 7          | 11          | 9              | 16          | 18            | 18            | 20          | 7                     | 11             | 9               | 8          | 12       | 16                    | 12               | 15            | 12         | 14            | 10          | 19     |
