# Supplementary material
Source: PubMed Central journal article supplement (PMC4375868)
Supplement: rspb20142903supp3.pdf [file rspb20142903supp3.pdf]

**Table S3:** Species genetic data, compiled from various sources, listed by species and by reference. For each sampled population in each respective reference, we report the population name and verbal location, Latitude (Lat) in decimal degrees, Longitude (Long) in decimal degrees, Elevation (Elev) in metres, number of individuals sampled (N), average number of alleles per locus (A), percent polymorphic loci (P), observed heterozygosity ( $H_o$ ), and expected heterozygosity ( $H_e$ ). Standard errors for  $H_o$  and  $H_e$  are listed in parentheses. Where data were not reported in the literature but was calculated by the authors of this paper, the values are listed in italics. Data that were not reported and that were not able to be estimated are noted with a hyphen. Where data are presented in the literature as population averages, the values are noted with an asterisk.

| Population code / name                            | Location & information | Lat         | Long         | Elev | N  | A    | P    | $H_o$ | (SE)  | $H_e$ | (SE)  |
|---------------------------------------------------|------------------------|-------------|--------------|------|----|------|------|-------|-------|-------|-------|
| <b><i>Abies amabilis</i> (Pacific silver fir)</b> |                        |             |              |      |    |      |      |       |       |       |       |
| <b>(Davidson &amp; El Kassaby, 1997)</b>          |                        |             |              |      |    |      |      |       |       |       |       |
| A                                                 | Taylor River, BC       | 48.30       | 125.37       | 300  | 8  | 1.64 | 66.7 | -     | -     | 0.097 | -     |
| B                                                 | Sebalhall Creek, BC    | 49.95       | 126.42       | 300  | 8  | 1.55 | 83.3 | -     | -     | 0.068 | -     |
| C                                                 | Maquilla Creek, BC     | 50.06       | 126.34       | 500  | 8  | 1.55 | 66.7 | -     | -     | 0.889 | -     |
| F                                                 | Fleet River, BC        | 48.65       | 124.10       | 710  | 9  | 1.73 | 66.7 | -     | -     | 0.156 | -     |
| H                                                 | Hathaway Creek, BC     | 50.58       | 127.73       | 212  | 13 | 1.73 | 83.3 | -     | -     | 0.124 | -     |
| N                                                 | Holberg Inlet, BC      | 50.73       | 128.00       | 215  | 11 | 1.55 | 66.7 | -     | -     | 0.109 | -     |
| R                                                 | Ronning Creek, BC      | 50.61       | 128.19       | 275  | 13 | 1.45 | 83.3 | -     | -     | 0.081 | -     |
| W                                                 | Mystery Creek, BC      | 48.8        | 128.15       | 625  | 17 | 1.82 | 83.3 | -     | -     | 0.177 | -     |
| <b><i>Abies lasiocarpa</i> (subalpine fir)</b>    |                        |             |              |      |    |      |      |       |       |       |       |
| <b>(Ettl &amp; Peterson, 2001)</b>                |                        |             |              |      |    |      |      |       |       |       |       |
| Mt. Dana high                                     | Olympic Mtns., WA      | <i>47.8</i> | <i>123.5</i> | 1800 | 30 | 1.6  | 26.7 | 0.070 | 0.042 | 0.079 | 0.048 |
| Klahhane Ridge high                               | Olympic Mtns., WA      | <i>48.0</i> | <i>123.4</i> | 1800 | 50 | 1.8  | 46.7 | 0.139 | 0.057 | 0.137 | 0.055 |
| Klahhane Ridge middle                             | Olympic Mtns., WA      | <i>48.0</i> | <i>123.4</i> | 1575 | 50 | 2.1  | 60.0 | 0.138 | 0.056 | 0.145 | 0.059 |
| Klahhane Ridge low                                | Olympic Mtns., WA      | <i>48.0</i> | <i>123.4</i> | 1350 | 50 | 2.1  | 60.0 | 0.139 | 0.057 | 0.143 | 0.058 |
| Blue Mtn. high                                    | Olympic Mtns., WA      | <i>47.6</i> | <i>123.2</i> | 1800 | 50 | 2.0  | 53.3 | 0.108 | 0.054 | 0.115 | 0.054 |
| Blue Mtn. middle 1                                | Olympic Mtns., WA      | <i>47.6</i> | <i>123.2</i> | 1575 | 50 | 1.9  | 46.7 | 0.116 | 0.054 | 0.117 | 0.055 |
| Blue Mtn. middle 2                                | Olympic Mtns., WA      | <i>47.6</i> | <i>123.2</i> | 1575 | 50 | 1.9  | 46.7 | 0.103 | 0.043 | 0.124 | 0.053 |
| Blue Mtn. low 1                                   | Olympic Mtns., WA      | <i>47.6</i> | <i>123.2</i> | 1350 | 50 | 2.0  | 60.0 | 0.120 | 0.046 | 0.139 | 0.053 |
| Blue Mtn. low 2                                   | Olympic Mtns., WA      | <i>47.6</i> | <i>123.2</i> | 1350 | 50 | 1.9  | 53.3 | 0.130 | 0.059 | 0.143 | 0.059 |

(Continued on next page)

**Table S3 – continued from previous page**

| Population                                      | Location/Comments | Lat   | Long   | Elev | N  | A     | P     | H <sub>o</sub> | (SE)  | H <sub>e</sub> | (SE)  |
|-------------------------------------------------|-------------------|-------|--------|------|----|-------|-------|----------------|-------|----------------|-------|
| <b><i>Abies procera</i> (noble fir)</b>         |                   |       |        |      |    |       |       |                |       |                |       |
| <b>(Yeh &amp; Hu, 2005)</b>                     |                   |       |        |      |    |       |       |                |       |                |       |
| 1 - Odell Butte                                 | WA & OR           | 43.27 | 121.52 | 1950 | 34 | 1.303 | 41.67 | -              | -     | 0.297          | 0.055 |
| 2 - Juniper Ridge                               | WA & OR           | 43.35 | 122.20 | 1700 | 34 | 1.250 | 41.67 | -              | -     | 0.254          | 0.058 |
| 3 - Grass Mtn.                                  | WA & OR           | 44.26 | 123.40 | 1060 | 34 | 1.247 | 37.50 | -              | -     | 0.231          | 0.061 |
| 4 - Mary's Peak                                 | WA & OR           | 44.30 | 123.33 | 1065 | 33 | 1.157 | 33.33 | -              | -     | 0.171          | 0.051 |
| 5 - Laurel Mtn.                                 | WA & OR           | 44.56 | 123.35 | 975  | 39 | 1.258 | 41.67 | -              | -     | 0.243          | 0.055 |
| 6 - Fisher Point                                | WA & OR           | 44.33 | 122.02 | 1220 | 36 | 1.252 | 45.83 | -              | -     | 0.254          | 0.054 |
| 7 - Snow Peak                                   | WA & OR           | 44.39 | 122.35 | 1060 | 36 | 1.214 | 41.67 | -              | -     | 0.218          | 0.054 |
| 8 - Elk Lake                                    | WA & OR           | 44.49 | 122.06 | 1200 | 36 | 1.264 | 45.83 | -              | -     | 0.265          | 0.061 |
| 9 - One Hundred Road                            | WA & OR           | 45.06 | 122.18 | 1130 | 36 | 1.213 | 33.33 | -              | -     | 0.210          | 0.058 |
| 10 - Elk Mtn.                                   | WA & OR           | 45.20 | 121.39 | 1220 | 33 | 1.245 | 41.67 | -              | -     | 0.249          | 0.054 |
| 11 - Larch Mtn.                                 | WA & OR           | 45.32 | 122.06 | 975  | 38 | 1.235 | 45.83 | -              | -     | 0.234          | 0.055 |
| 12 - Mt. Defiance                               | WA & OR           | 45.38 | 121.44 | 1125 | 39 | 1.251 | 45.83 | -              | -     | 0.261          | 0.053 |
| 13 - Larch Mtn.                                 | WA & OR           | 45.43 | 122.17 | 975  | 35 | 1.231 | 45.83 | -              | -     | 0.244          | 0.051 |
| 14 - Red Mtn.                                   | WA & OR           | 45.56 | 121.50 | 1220 | 33 | 1.189 | 33.33 | -              | -     | 0.190          | 0.056 |
| 15 - Hungry Peak                                | WA & OR           | 46.07 | 121.54 | 1280 | 34 | 1.150 | 37.50 | -              | -     | 0.153          | 0.051 |
| 16 - French Butte                               | WA & OR           | 46.20 | 121.57 | 1300 | 35 | 1.216 | 37.50 | -              | -     | 0.221          | 0.053 |
| 17 - Mud Lake                                   | WA & OR           | 46.24 | 121.37 | 1425 | 37 | 1.226 | 41.67 | -              | -     | 0.231          | 0.052 |
| 18 - McKinley Lake                              | WA & OR           | 46.35 | 122.08 | 900  | 33 | 1.157 | 33.33 | -              | -     | 0.179          | 0.047 |
| 19 - Corral Pass                                | WA & OR           | 47.01 | 121.08 | 1615 | 38 | 1.258 | 45.83 | -              | -     | 0.270          | 0.049 |
| 20 - Stampede Pass                              | WA & OR           | 47.14 | 121.22 | 1065 | 33 | 1.208 | 37.50 | -              | -     | 0.210          | 0.055 |
| 21 - Stevens Pass                               | WA & OR           | 47.43 | 121.08 | 1000 | 33 | 1.258 | 37.50 | -              | -     | 0.253          | 0.058 |
| <b><i>Acer macrophyllum</i> (bigleaf maple)</b> |                   |       |        |      |    |       |       |                |       |                |       |
| <b>(Iddrisu &amp; Ritland, 2004)</b>            |                   |       |        |      |    |       |       |                |       |                |       |
| Jericho                                         | Jericho area, BC  | 49.2  | 123.1  | 0    | 40 | 2.2   | 80    | 0.108          | 0.029 | 0.102          | 0.026 |
| Fraser                                          | Fraser area, BC   | 49.0  | 121.0  | 50   | 36 | 2.0   | 60    | 0.112          | 0.036 | 0.105          | 0.033 |
| Artic                                           | Artic area, WA    | 46.5  | 123.4  | 60   | 14 | 1.5   | 50    | 0.160          | 0.060 | 0.189          | 0.066 |

(Continued on next page)

**Table S3 – continued from previous page**

| Population                            | Location/Comments  | Lat   | Long   | Elev | N  | A    | P    | H <sub>o</sub> | (SE)  | H <sub>e</sub> | (SE)  |
|---------------------------------------|--------------------|-------|--------|------|----|------|------|----------------|-------|----------------|-------|
| Cascadia                              | Cascadia area, OR  | 44.4  | 122.5  | 250  | 20 | 1.6  | 60   | 0.121          | 0.037 | 0.164          | 0.046 |
| Elbe                                  | Elbe area, WA      | 46.5  | 122.1  | 380  | 20 | 1.6  | 60   | 0.109          | 0.035 | 0.172          | 0.049 |
| Helmick                               | Helmick area, OR   | 44.8  | 123.2  | 60   | 20 | 1.6  | 60   | 0.118          | 0.038 | 0.176          | 0.049 |
| Oakville                              | Oakville area, WA  | 46.8  | 123.2  | 30   | 20 | 1.6  | 60   | 0.117          | 0.033 | 0.148          | 0.041 |
| Siletz                                | Siletz area, OR    | 44.7  | 123.9  | 40   | 20 | 1.6  | 60   | 0.102          | 0.031 | 0.163          | 0.047 |
| <b><i>Alnus rubra</i> (red alder)</b> |                    |       |        |      |    |      |      |                |       |                |       |
| <b>(Xie <i>et al.</i>, 2002)</b>      |                    |       |        |      |    |      |      |                |       |                |       |
| Mainland - GVWD                       | Seymour, BC        | 49.40 | 122.97 | 200  | 26 | 1.53 | 31.6 | 0.099          | 0.038 | 0.112          | 0.043 |
| Mainland - CHEA                       | Cheakmus River, BC | 50.07 | 123.10 | 540  | 39 | 1.53 | 36.8 | 0.111          | 0.041 | 0.119          | 0.044 |
| Mainland - KING                       | Kingcome Inlet, BC | 51.50 | 126.13 | 30   | 52 | 1.53 | 31.6 | 0.109          | 0.040 | 0.121          | 0.044 |
| Mainland - NACH                       | Nachelor Bay, BC   | 52.37 | 126.92 | 30   | 55 | 1.58 | 31.6 | 0.129          | 0.048 | 0.130          | 0.048 |
| Mainland - SALL                       | Salloomt River, BC | 52.43 | 126.92 | 150  | 56 | 1.53 | 31.6 | 0.116          | 0.044 | 0.113          | 0.042 |
| Mainland - SNOW                       | Snow Creek, BC     | 54.25 | 129.55 | 10   | 63 | 1.47 | 31.6 | 0.144          | 0.057 | 0.153          | 0.056 |
| Mainland - PRINT                      | Prince Rupert, BC  | 54.27 | 130.27 | 46   | 65 | 1.53 | 31.6 | 0.115          | 0.047 | 0.112          | 0.043 |
| Mainland - SHAM                       | Shames River, BC   | 54.43 | 128.92 | 100  | 68 | 1.47 | 31.6 | 0.119          | 0.048 | 0.120          | 0.046 |
| Islands - PORTR                       | Port Renfrew, BC   | 48.60 | 124.23 | 20   | 4  | 1.47 | 26.3 | 0.070          | 0.032 | 0.071          | 0.032 |
| Islands - COW                         | Cowichan M.F., BC  | 48.77 | 123.65 | 150  | 9  | 1.42 | 26.3 | 0.058          | 0.029 | 0.066          | 0.031 |
| Islands - UCLU                        | Ucluelet , BC      | 49.00 | 125.57 | 40   | 14 | 1.37 | 26.3 | 0.068          | 0.029 | 0.090          | 0.038 |
| Islands - LOWR                        | Lowry Lake, BC     | 49.40 | 125.15 | 120  | 28 | 1.63 | 36.8 | 0.093          | 0.038 | 0.103          | 0.041 |
| Islands - WOSS                        | Woss #2, BC        | 49.97 | 126.25 | 150  | 37 | 1.47 | 26.3 | 0.067          | 0.030 | 0.075          | 0.034 |
| Islands - BIGT                        | Bigtree #2, BC     | 50.23 | 125.72 | 300  | 45 | 1.53 | 26.3 | 0.121          | 0.054 | 0.123          | 0.052 |
| Islands - PORTH                       | Port Hardy, BC     | 50.62 | 127.25 | 37   | 49 | 1.53 | 31.6 | 0.077          | 0.033 | 0.092          | 0.038 |
| Islands - NE62                        | Ne 62, BC          | 50.72 | 127.98 | 170  | 51 | 1.53 | 31.6 | 0.104          | 0.046 | 0.102          | 0.044 |
| Islands - POOL                        | Poole Inlet, BC    | 52.35 | 131.35 | 1    | 53 | 1.58 | 31.6 | 0.070          | 0.029 | 0.090          | 0.035 |
| Islands - COPP                        | Copper Bay, BC     | 53.12 | 131.67 | 10   | 57 | 1.47 | 26.3 | 0.079          | 0.035 | 0.088          | 0.038 |
| Islands - MASS                        | Masset , BC        | 54.05 | 132.00 | 10   | 61 | 1.53 | 31.6 | 0.102          | 0.044 | 0.105          | 0.044 |

(Continued on next page)

**Table S3 – continued from previous page**

| Population                                          | Location/Comments   | Lat  | Long  | Elev  | N  | A   | P  | H <sub>o</sub> | (SE) | H <sub>e</sub> | (SE)  |
|-----------------------------------------------------|---------------------|------|-------|-------|----|-----|----|----------------|------|----------------|-------|
| <b><i>Calocedrus decurrens</i> (incense cedar)</b>  |                     |      |       |       |    |     |    |                |      |                |       |
| <b>(Harry, 1984)</b>                                |                     |      |       |       |    |     |    |                |      |                |       |
| Kilarc-LS                                           | Sierra Nevada, CA   | 40.7 | 121.9 | 890   | 43 | 2.8 | 52 | -              | -    | 0.207          | 0.043 |
| Kilarc-LN                                           | Sierra Nevada, CA   | 40.7 | 121.9 | 890   | 44 | 2.8 | 52 | -              | -    | 0.184          | 0.039 |
| Kilarc-HS                                           | Sierra Nevada, CA   | 40.7 | 121.9 | 1390  | 50 | 3.0 | 60 | -              | -    | 0.222          | 0.041 |
| Kilarc-HN                                           | Sierra Nevada, CA   | 40.7 | 121.9 | 1390  | 52 | 3.0 | 60 | -              | -    | 0.181          | 0.039 |
| Bailey-LS                                           | Sierra Nevada, CA   | 38.4 | 120.3 | 1510  | 46 | 2.7 | 44 | -              | -    | 0.177          | 0.042 |
| Bailey-LN                                           | Sierra Nevada, CA   | 38.4 | 120.3 | 1510  | 40 | 2.6 | 56 | -              | -    | 0.186          | 0.035 |
| Bailey-HS                                           | Sierra Nevada, CA   | 38.4 | 120.3 | 2010  | 49 | 2.4 | 56 | -              | -    | 0.176          | 0.039 |
| Bailey-HN                                           | Sierra Nevada, CA   | 38.4 | 120.3 | 2010  | 50 | 2.3 | 48 | -              | -    | 0.182          | 0.043 |
| Greenhorn-LS                                        | Sierra Nevada, CA   | 35.7 | 118.3 | 1790  | 49 | 2.1 | 48 | -              | -    | 0.172          | 0.041 |
| Greenhorn-LN                                        | Sierra Nevada, CA   | 35.7 | 118.3 | 1790  | 51 | 2.4 | 40 | -              | -    | 0.166          | 0.040 |
| Greenhorn-HS                                        | Sierra Nevada, CA   | 35.7 | 118.3 | 2290  | 45 | 1.9 | 40 | -              | -    | 0.149          | 0.038 |
| Greenhorn-HN                                        | Sierra Nevada, CA   | 35.7 | 118.3 | 2290  | 51 | 2.4 | 44 | -              | -    | 0.154          | 0.040 |
| <b><i>Cupressus nootkatensis</i> (yellow cedar)</b> |                     |      |       |       |    |     |    |                |      |                |       |
| <b>(Ritland <i>et al.</i>, 2001)</b>                |                     |      |       |       |    |     |    |                |      |                |       |
| Mt. Baker                                           | Mt. Baker, WA       | 48.8 | 121.8 | >1000 | 32 | 1.8 | 60 | -              | -    | 0.153          | 0.014 |
| Port Hardy                                          | Port Hardy, BC      | 50.7 | 127.5 | 0     | 32 | 1.7 | 60 | -              | -    | 0.132          | 0.011 |
| Mt. Washington                                      | Mt. Washington, BC  | 49.8 | 125.3 | 1000  | 35 | 1.5 | 40 | -              | -    | 0.090          | 0.013 |
| Tofino                                              | Tofino, BC          | 49.1 | 125.9 | 0     | 36 | 1.7 | 50 | -              | -    | 0.161          | 0.011 |
| Anchorage                                           | Anchorage, AK       | 61.2 | 149.9 | 0     | 27 | 1.4 | 30 | -              | -    | 0.062          | 0.006 |
| Juneau                                              | Juneau, AK          | 58.4 | 134.2 | 0     | 30 | 1.7 | 50 | -              | -    | 0.198          | 0.010 |
| Petersburg                                          | Petersburg, AK      | 56.8 | 132.9 | 0     | 33 | 1.8 | 60 | -              | -    | 0.197          | 0.010 |
| Ketchikan                                           | Ketchikan, AK       | 52.4 | 131.7 | 1000  | 30 | 1.8 | 60 | -              | -    | 0.192          | 0.011 |
| Prince Rupert                                       | Prince Rupert, BC   | 54.3 | 130.3 | 0     | 32 | 1.7 | 50 | -              | -    | 0.163          | 0.011 |
| Bella Coola                                         | Bella Coola, BC     | 52.4 | 126.8 | <1000 | 32 | 1.7 | 50 | -              | -    | 0.141          | 0.008 |
| Hurricane Ridge                                     | Hurricane Ridge, WA | 48.0 | 123.5 | >1000 | 31 | 1.8 | 60 | -              | -    | 0.149          | 0.009 |
| Mt. Rainier                                         | Mt. Rainier, WA     | 46.9 | 121.8 | <1000 | 32 | 1.6 | 40 | -              | -    | 0.117          | 0.015 |

(Continued on next page)

**Table S3 – continued from previous page**

| Population                                         | Location/Comments        | Lat   | Long   | Elev   | N     | A    | P    | H <sub>o</sub> | (SE)  | H <sub>e</sub> | (SE)  |
|----------------------------------------------------|--------------------------|-------|--------|--------|-------|------|------|----------------|-------|----------------|-------|
| Oakridge                                           | Oakridge, OR             | 43.7  | 122.5  | >1000  | 32    | 1.8  | 60   | -              | -     | 0.156          | 0.010 |
| Whiskey Peak                                       | Whiskey Peak, OR         | 42.0  | 123.3  | >1000  | 30    | 1.5  | 30   | -              | -     | 0.101          | 0.011 |
| Castlegar                                          | Castlegar, BC            | 49.3  | 117.7  | <1000  | 23    | 1.6  | 40   | -              | -     | 0.187          | 0.007 |
| Black Tusk                                         | Black Tusk, BC           | 50.0  | 123.0  | 1000   | 32    | 1.8  | 60   | -              | -     | 0.183          | 0.015 |
| Queen Charlotte                                    | Queen Charlotte, BC      | 53.8  | 132.0  | 400    | 31    | 1.7  | 50   | -              | -     | 0.123          | 0.011 |
| <b><i>Larix occidentalis</i> (western larch)</b>   |                          |       |        |        |       |      |      |                |       |                |       |
| <b>(Jaquish &amp; El-Kassaby, 1998)</b>            |                          |       |        |        |       |      |      |                |       |                |       |
| 1 - FLAT                                           | Flathead, BC             | 49.07 | 114.43 | 1380   | 34    | 1.95 | 40   | 0.151          | 0.038 | 0.151          | 0.037 |
| 2 - PLUM                                           | Plumbob, BC              | 49.25 | 115.40 | 1160   | 30    | 1.80 | 50   | 0.177          | 0.040 | 0.173          | 0.040 |
| 3 - CARR                                           | Carrol Creek Road, BC    | 49.10 | 116.20 | 975    | 35    | 1.90 | 65   | 0.174          | 0.035 | 0.185          | 0.037 |
| 4 - SALM                                           | Salmo, BC                | 49.23 | 117.27 | 800    | 35    | 1.85 | 40   | 0.151          | 0.041 | 0.143          | 0.038 |
| 5 - CHRI                                           | Christina Lake, BC       | 49.22 | 118.15 | 1200   | 35    | 1.80 | 70   | 0.206          | 0.045 | 0.219          | 0.040 |
| 6 - BLUE                                           | Blue Ridge Kaslo, BC     | 50.05 | 117.08 | 1375   | 36    | 1.85 | 65   | 0.204          | 0.038 | 0.220          | 0.042 |
| 7 - WILS                                           | Wilson Lake Road, BC     | 50.23 | 117.72 | 1300   | 36    | 1.80 | 70   | 0.236          | 0.045 | 0.237          | 0.043 |
| 8 - BECK                                           | Becker Lake, BC          | 50.25 | 119.17 | 1200   | 38    | 1.80 | 65   | 0.213          | 0.042 | 0.204          | 0.039 |
| 9 - MERR                                           | Merritt, BC              | 50.28 | 120.93 | 1300   | 34    | 1.70 | 55   | 0.151          | 0.036 | 0.156          | 0.037 |
| <b>(Fins &amp; Seeb, 1986)</b>                     |                          |       |        |        |       |      |      |                |       |                |       |
| Eastern Washington                                 | 7 stands, Eastern WA     | 48.6  | 118.4  | 1197.9 | 69    | 1.3  | 30*  | 0.079          | 0.035 | 0.089          | 0.039 |
| Northern Idaho                                     | 9 stands, Northern ID    | 47.3  | 116.3  | 1282.4 | 79    | 1.3  | 30*  | 0.049          | 0.020 | 0.074          | 0.032 |
| Western Montana                                    | 3 stands, Western MT     | 46.6  | 114.5  | 1473.3 | 29    | 1.2  | 30*  | 0.054          | 0.031 | 0.068          | 0.033 |
| Payette                                            | One stand, Payette, ID   | 45.1  | 116.4  | 1646.0 | 10    | 1.3  | 30*  | 0.078          | 0.048 | 0.089          | 0.051 |
| <b><i>Picea engelmannii</i> (Engelmann spruce)</b> |                          |       |        |        |       |      |      |                |       |                |       |
| <b>(Ledig et al., 2006)</b>                        |                          |       |        |        |       |      |      |                |       |                |       |
| Kootenay River                                     | Nelson Forest Region, BC | 50.97 | 116.27 | 1830   | 27.5* | 2.7  | 66.7 | -              | -     | 0.247          | 0.047 |
| Moyie                                              | Nelson Forest Region, BC | 49.53 | 116.10 | 1700   | 27.5* | 2.6  | 70.8 | -              | -     | 0.247          | 0.044 |
| Bluebird Creek                                     | Nelson Forest Region, BC | 49.13 | 116.88 | 1430   | 27.5* | 2.7  | 66.7 | -              | -     | 0.268          | 0.046 |
| Summit Lake                                        | Payette N.F., ID         | 45.05 | 115.92 | 2075   | 27.5* | 2.3  | 75.0 | -              | -     | 0.252          | 0.043 |

(Continued on next page)

**Table S3 – continued from previous page**

| Population                                | Location/Comments               | Lat   | Long   | Elev | N     | A    | P    | H <sub>o</sub> | (SE)  | H <sub>e</sub> | (SE)  |
|-------------------------------------------|---------------------------------|-------|--------|------|-------|------|------|----------------|-------|----------------|-------|
| Beartooth Pass                            | Shoshone N.F., WY               | 44.93 | 109.52 | 2985 | 27.5* | 2.5  | 75.0 | -              | -     | 0.307          | 0.045 |
| Panther Creek                             | Salmon N.F., ID                 | 44.88 | 114.30 | 2135 | 27.5* | 2.5  | 75.0 | -              | -     | 0.253          | 0.045 |
| Six Bit Spring                            | Cache N.F., UT                  | 41.58 | 111.43 | 2560 | 27.5* | 2.1  | 54.2 | -              | -     | 0.227          | 0.045 |
| Highline Trailhead                        | Wasatch N.F., UT                | 40.73 | 110.87 | 3180 | 27.5* | 2.4  | 58.3 | -              | -     | 0.228          | 0.043 |
| Ferron Reservoir                          | Manti-Lasal N.F., UT            | 39.13 | 111.45 | 2930 | 27.5* | 2.2  | 62.5 | -              | -     | 0.215          | 0.040 |
| Barlow Lake                               | San Juan N.F., CO               | 37.75 | 107.98 | 2955 | 27.5* | 2.6  | 70.8 | -              | -     | 0.296          | 0.046 |
| Navajo Lake                               | Dixie N.F., UT                  | 37.53 | 112.77 | 2865 | 27.5* | 2.2  | 54.2 | -              | -     | 0.231          | 0.044 |
| East Gavilan Canyon                       | Carson N.F., NM                 | 36.73 | 106.30 | 2970 | 27.5* | 2.5  | 75.0 | -              | -     | 0.273          | 0.046 |
| San Francisco Mtns.                       | Coconino N.F., AZ               | 35.33 | 111.70 | 2775 | 27.5* | 2.4  | 66.7 | -              | -     | 0.269          | 0.046 |
| Sierra Blanca                             | Sierra Blanca, Lincoln N.F., NM | 33.40 | 105.78 | 2925 | 27.5* | 2.1  | 66.7 | -              | -     | 0.282          | 0.050 |
| Mt. Graham                                | Mt. Graham, Coronado N.F., AZ   | 32.67 | 109.87 | 3018 | 27.5* | 2.4  | 66.7 | -              | -     | 0.261          | 0.047 |
| Flys Peak                                 | Flys Peak, Coronado N.F., AZ    | 31.87 | 109.28 | 2866 | 27.5* | 2.0  | 62.5 | -              | -     | 0.227          | 0.043 |
| <b><i>Picea glauca</i> (white spruce)</b> |                                 |       |        |      |       |      |      |                |       |                |       |
| <b>(Godt <i>et al.</i>, 2001)</b>         |                                 |       |        |      |       |      |      |                |       |                |       |
| Site 1                                    | SK                              | -     | -      | -    | 47.5* | 1.83 | 44.4 | 0.181          | 0.042 | 0.158          | 0.053 |
| Site 2                                    | SK                              | -     | -      | -    | 47.5* | 1.78 | 55.6 | 0.167          | 0.046 | 0.158          | 0.049 |
| Site 3                                    | SK                              | -     | -      | -    | 47.5* | 1.72 | 44.4 | 0.153          | 0.042 | 0.166          | 0.052 |
| Site 4                                    | SK                              | -     | -      | -    | 47.5* | 1.72 | 44.4 | 0.154          | 0.042 | 0.159          | 0.052 |
| Site 5                                    | SK                              | -     | -      | -    | 47.5* | 1.67 | 44.4 | 0.164          | 0.045 | 0.167          | 0.050 |
| Site 6                                    | SK                              | -     | -      | -    | 47.5* | 1.61 | 44.4 | 0.162          | 0.041 | 0.157          | 0.052 |
| Site 7                                    | SK                              | -     | -      | -    | 47.5* | 1.72 | 50.0 | 0.156          | 0.044 | 0.160          | 0.049 |
| <b>(Furnier <i>et al.</i>, 1991)</b>      |                                 |       |        |      |       |      |      |                |       |                |       |
| A                                         | NF East                         | -     | -      | -    | 20    | 2.2  | 100  | 0.367          | -     | 0.329          | -     |
| B                                         | NF West                         | -     | -      | -    | 20    | 2.2  | 100  | 0.300          | -     | 0.291          | -     |
| C                                         | NB                              | -     | -      | -    | 20    | 2.5  | 100  | 0.242          | -     | 0.280          | -     |
| D                                         | MN                              | -     | -      | -    | 20    | 2.5  | 83.3 | 0.283          | -     | 0.256          | -     |
| E                                         | QC Central                      | -     | -      | -    | 19    | 2.0  | 100  | 0.263          | -     | 0.275          | -     |
| F                                         | MA                              | -     | -      | -    | 19    | 2.0  | 100  | 0.272          | -     | 0.250          | -     |

(Continued on next page)

**Table S3 – continued from previous page**

| Population | Location/Comments | Lat | Long | Elev | N  | A   | P    | H <sub>o</sub> | (SE) | H <sub>e</sub> | (SE) |
|------------|-------------------|-----|------|------|----|-----|------|----------------|------|----------------|------|
| G          | NY                | -   | -    | -    | 20 | 2.2 | 100  | 0.333          | -    | 0.301          | -    |
| H          | QC South          | -   | -    | -    | 20 | 2.0 | 100  | 0.275          | -    | 0.293          | -    |
| I          | ON Southeast      | -   | -    | -    | 20 | 2.2 | 100  | 0.325          | -    | 0.307          | -    |
| J          | ON East           | -   | -    | -    | 20 | 1.8 | 83.3 | 0.250          | -    | 0.230          | -    |
| K          | ON Northeast      | -   | -    | -    | 20 | 2.5 | 100  | 0.283          | -    | 0.295          | -    |
| L          | MI                | -   | -    | -    | 19 | 2.0 | 100  | 0.386          | -    | 0.340          | -    |
| M          | WI                | -   | -    | -    | 20 | 2.2 | 100  | 0.300          | -    | 0.309          | -    |
| N          | ON West           | -   | -    | -    | 19 | 2.3 | 100  | 0.404          | -    | 0.353          | -    |
| O          | MN                | -   | -    | -    | 20 | 2.3 | 100  | 0.283          | -    | 0.281          | -    |
| P          | MB South          | -   | -    | -    | 20 | 2.3 | 100  | 0.383          | -    | 0.357          | -    |
| Q          | MB North          | -   | -    | -    | 20 | 2.3 | 100  | 0.350          | -    | 0.323          | -    |
| R          | SD                | -   | -    | -    | 20 | 2.0 | 100  | 0.308          | -    | 0.294          | -    |
| S          | SK North          | -   | -    | -    | 20 | 1.8 | 83.3 | 0.233          | -    | 0.198          | -    |
| T          | MT                | -   | -    | -    | 5  | 1.8 | 66.7 | 0.367          | -    | 0.319          | -    |
| U          | BC                | -   | -    | -    | 20 | 2.2 | 100  | 0.233          | -    | 0.261          | -    |
| V          | AK                | -   | -    | -    | 20 | 2.0 | 83.3 | 0.283          | -    | 0.239          | -    |

*Picea mariana* (black spruce)

(Rajora & Pluhar, 2003)

|        |                                           |       |        |     |    |      |      |       |       |       |       |
|--------|-------------------------------------------|-------|--------|-----|----|------|------|-------|-------|-------|-------|
| E1-FNM | Post-fire nat mature, Pine Falls, MB      | 50.68 | 95.90  | 274 | 35 | 2.59 | 65.6 | 0.215 | 0.037 | 0.296 | 0.045 |
| E1-FNR | Post-fire nat young regen, Pine Falls, MB | 50.68 | 95.89  | 274 | 35 | 2.31 | 62.5 | 0.176 | 0.033 | 0.265 | 0.045 |
| E1-HNR | Post-harvest nat regen, Pine Falls, MB    | 50.68 | 95.90  | 274 | 35 | 2.53 | 62.5 | 0.222 | 0.004 | 0.293 | 0.047 |
| E1-PLT | Plantation, Pine Falls, MB                | 50.67 | 95.91  | 290 | 35 | 2.53 | 65.6 | 0.198 | 0.037 | 0.279 | 0.045 |
| E2-FNM | Post-fire nat mature, Bissett, MB         | 50.78 | 95.28  | 320 | 35 | 2.59 | 75.0 | 0.223 | 0.035 | 0.317 | 0.042 |
| E2-FNR | Post-fire nat young regen, Bissett, MB    | 50.78 | 95.29  | 320 | 35 | 2.69 | 75.0 | 0.263 | 0.041 | 0.335 | 0.042 |
| E2-HNR | Post-harvest nat regen, Bissett, MB       | 50.78 | 95.28  | 320 | 35 | 2.50 | 59.4 | 0.267 | 0.047 | 0.322 | 0.050 |
| E2-PLT | Plantation, Bissett, MB                   | 50.83 | 95.32  | 305 | 35 | 2.66 | 71.9 | 0.240 | 0.039 | 0.328 | 0.045 |
| N1-FNM | Post-fire nat mature, The Pas, MB         | 54.29 | 101.39 | 294 | 35 | 2.34 | 59.4 | 0.201 | 0.044 | 0.272 | 0.046 |
| N1-FNR | Post-fire nat regen, The Pas, MB          | 54.27 | 101.38 | 294 | 35 | 2.34 | 62.5 | 0.193 | 0.042 | 0.280 | 0.046 |

(Continued on next page)

**Table S3 – continued from previous page**

| Population                                    | Location/Comments                        | Lat   | Long   | Elev | N  | A    | P    | H <sub>o</sub> | (SE)  | H <sub>e</sub> | (SE)  |
|-----------------------------------------------|------------------------------------------|-------|--------|------|----|------|------|----------------|-------|----------------|-------|
| N1-HNR                                        | Post-harvest nat regen, The Pas, MB      | 54.30 | 101.48 | 290  | 35 | 2.56 | 71.9 | 0.219          | 0.043 | 0.335          | 0.045 |
| N1-PLT                                        | Plantation, The Pas, MB                  | 54.29 | 101.44 | 290  | 35 | 2.16 | 59.4 | 0.203          | 0.041 | 0.291          | 0.045 |
| N2-FNM                                        | Post-fire nat mature, Snow Lake, MB      | 54.90 | 99.76  | 290  | 35 | 2.63 | 68.8 | 0.242          | 0.045 | 0.341          | 0.048 |
| N2-FNR                                        | Post-fire nat young regen, Snow Lake, MB | 54.72 | 99.98  | 274  | 35 | 2.47 | 68.8 | 0.169          | 0.030 | 0.279          | 0.043 |
| N2-HNR                                        | Post-harvest nat regen, Snow Lake, MB    | 54.90 | 99.76  | 290  | 35 | 2.66 | 71.9 | 0.239          | 0.044 | 0.328          | 0.047 |
| N2-PLT                                        | Plantation, Snow Lake, MB                | 54.90 | 99.76  | 290  | 35 | 2.69 | 68.8 | 0.279          | 0.048 | 0.362          | 0.047 |
| <b>(O'Reilly <i>et al.</i>, 1985)</b>         |                                          |       |        |      |    |      |      |                |       |                |       |
| Sioux Narrows - Upland                        | Sioux Narrows, ON                        | 49.42 | 94.13  | -    | 10 | -    | 53.3 | -              | -     | 0.20           | -     |
| Sioux Narrows - Lowland                       | Sioux Narrows, ON                        | 49.42 | 94.13  | -    | 10 | -    | 46.7 | -              | -     | 0.22           | -     |
| Sioux Lookout - Upland                        | Sioux Lookout, ON                        | 50.15 | 91.75  | -    | 10 | -    | 33.3 | -              | -     | 0.16           | -     |
| Sioux Lookout - Lowland                       | Sioux Lookout, ON                        | 50.15 | 91.75  | -    | 10 | -    | 53.3 | -              | -     | 0.21           | -     |
| Nipigon - Upland                              | Nipigon, ON                              | 48.83 | 88.58  | -    | 10 | -    | 64.3 | -              | -     | 0.26           | -     |
| Nipigon - Lowland                             | Nipigon, ON                              | 48.83 | 88.58  | -    | 10 | -    | 73.3 | -              | -     | 0.27           | -     |
| Macdiarmid - Upland                           | Macdiarmid, ON                           | 49.42 | 88.12  | -    | 10 | -    | 46.7 | -              | -     | 0.20           | -     |
| Macdiarmid - Lowland                          | Macdiarmid, ON                           | 49.42 | 88.12  | -    | 10 | -    | 46.7 | -              | -     | 0.22           | -     |
| Cochrane - Upland                             | Cochrane, ON                             | 49.08 | 80.92  | -    | 10 | -    | 40.0 | -              | -     | 0.23           | -     |
| Cochrane - Lowland                            | Cochrane, ON                             | 49.08 | 80.92  | -    | 10 | -    | 66.7 | -              | -     | 0.25           | -     |
| <b>(Isabel <i>et al.</i>, 1995)</b>           |                                          |       |        |      |    |      |      |                |       |                |       |
| 325                                           | QC                                       | 50.2  | 74.2   | -    | 15 | 2.3  | 76.9 | 0.267          | 0.056 | 0.287          | 0.063 |
| 336                                           | QC                                       | 48.0  | 78.9   | -    | 15 | 2.0  | 69.2 | 0.337          | 0.085 | 0.285          | 0.062 |
| 342                                           | QC                                       | 50.4  | 68.4   | -    | 15 | 2.5  | 61.5 | 0.305          | 0.077 | 0.301          | 0.070 |
| 345                                           | QC                                       | 47.2  | 74.3   | -    | 15 | 2.1  | 69.2 | 0.348          | 0.083 | 0.311          | 0.071 |
| 369                                           | QC                                       | 48.3  | 64.2   | -    | 15 | 2.2  | 69.2 | 0.435          | 0.099 | 0.324          | 0.065 |
| <b><i>Picea sitchensis</i> (sitka spruce)</b> |                                          |       |        |      |    |      |      |                |       |                |       |
| <b>(Yeh &amp; El-Kassaby, 1980)</b>           |                                          |       |        |      |    |      |      |                |       |                |       |
| IUFRO-3024                                    | Duck Cr., AK                             | 58.37 | 134.58 | 30   | 76 | 2.00 | 67   | -              | -     | 0.16           | 0.03  |
| IUFRO-3030                                    | Ward L., AK                              | 55.42 | 131.70 | 15   | 78 | 1.62 | 50   | -              | -     | 0.15           | 0.04  |

(Continued on next page)



**Table S3 – continued from previous page**

| Population                                      | Location/Comments                        | Lat   | Long   | Elev | N  | A    | P    | H <sub>o</sub> | (SE)  | H <sub>e</sub> | (SE)  |
|-------------------------------------------------|------------------------------------------|-------|--------|------|----|------|------|----------------|-------|----------------|-------|
| IUFRO-3040                                      | Usk Ferry, BC                            | 54.77 | 128.25 | 137  | 79 | 1.69 | 46   | -              | -     | 0.15           | 0.04  |
| IUFRO-3044                                      | Inverness, BC                            | 54.20 | 130.25 | 15   | 79 | 1.77 | 50   | -              | -     | 0.13           | 0.04  |
| IUFRO-3049                                      | Link Rd., BC                             | 53.50 | 132.17 | 90   | 78 | 1.85 | 50   | -              | -     | 0.16           | 0.04  |
| IUFRO-3058                                      | Salmon Bay, BC                           | 50.38 | 125.95 | 0    | 78 | 1.69 | 42   | -              | -     | 0.14           | 0.04  |
| IUFRO-3062                                      | Big Qualicum R., BC                      | 49.38 | 124.62 | 0    | 78 | 1.92 | 54   | -              | -     | 0.16           | 0.04  |
| IUFRO-3003                                      | Forks, WA                                | 48.07 | 124.30 | 137  | 79 | 1.92 | 46   | -              | -     | 0.17           | 0.04  |
| IUFRO-3008                                      | Hoquiam, WA                              | 47.08 | 124.05 | 7    | 79 | 1.85 | 50   | -              | -     | 0.13           | 0.04  |
| IUFRO-3012                                      | Necanicum, OR                            | 45.82 | 123.77 | 46   | 78 | 1.85 | 58   | -              | -     | 0.13           | 0.04  |
| <b><i>Pinus albicaulis</i> (whitebark pine)</b> |                                          |       |        |      |    |      |      |                |       |                |       |
| <b>(Bruederle <i>et al.</i>, 1998)</b>          |                                          |       |        |      |    |      |      |                |       |                |       |
| 1. Miller Creek                                 | Gallatin Park, MT                        | 45.4  | 110.2  | -    | 30 | 1.6  | 42.1 | 0.167          | 0.052 | 0.146          | 0.045 |
| 2. Henderson Mtn.                               | Gallatin Park, MT                        | 45.0  | 110.0  | -    | 31 | 1.7  | 36.8 | 0.139          | 0.043 | 0.164          | 0.049 |
| 3. Fisher Creek                                 | Gallatin Park, MT                        | 45.1  | 109.9  | -    | 34 | 1.5  | 42.1 | 0.139          | 0.043 | 0.151          | 0.047 |
| 4. Island Lake                                  | Shoshone Park, WY                        | 44.9  | 109.5  | -    | 49 | 1.7  | 36.8 | 0.153          | 0.047 | 0.151          | 0.046 |
| 5. Mt. Washburn                                 | Yellowstone N.P., WY                     | 44.8  | 110.4  | -    | 33 | 1.6  | 36.8 | 0.139          | 0.045 | 0.145          | 0.046 |
| 6. Union Pass                                   | Shoshone Forest, Fremont County, WY      | 43.5  | 109.9  | -    | 20 | 1.5  | 36.8 | 0.161          | 0.054 | 0.146          | 0.047 |
| 7. Togwotee Pass                                | Bridger-Teton Forest, Teton County, WY   | 43.8  | 110.1  | -    | 25 | 1.7  | 36.8 | 0.141          | 0.047 | 0.153          | 0.046 |
| 8. Sheep Pass                                   | Bridger-Teton Forest, Lincoln County, WY | 42.5  | 110.8  | -    | 30 | 1.6  | 36.8 | 0.152          | 0.045 | 0.155          | 0.047 |
| 9. Commissary Ridge                             | Bridger-Teton Forest, Lincoln County, WY | 42.2  | 110.6  | -    | 30 | 1.6  | 42.1 | 0.138          | 0.042 | 0.161          | 0.048 |
| <b>(Jorgensen &amp; Hamrick, 1997)</b>          |                                          |       |        |      |    |      |      |                |       |                |       |
| 1. Cascade - WASH                               | Washington Pass, WA                      | 48.53 | 120.67 | -    | 48 | 2.00 | 25   | 0.092          | 0.009 | 0.096          | 0.039 |
| 2. Cascade - RAIN                               | Mt. Rainier N.P., WA                     | 46.92 | 121.65 | -    | 48 | 2.22 | 35   | 0.092          | 0.009 | 0.109          | 0.035 |
| 3. Cascade - ADAM                               | Mt. Adams, WA                            | 46.25 | 121.53 | -    | 48 | 2.00 | 25   | 0.083          | 0.009 | 0.075          | 0.033 |
| 4. Cascade - HOOD                               | Mt. Hood, OR                             | 45.40 | 121.67 | -    | 48 | 2.25 | 15   | 0.084          | 0.009 | 0.089          | 0.039 |
| 5. Cascade - BACH                               | Bachelor Peak, OR                        | 43.98 | 121.68 | -    | 48 | 2.00 | 20   | 0.082          | 0.009 | 0.080          | 0.037 |
| 6. Cascade - CRAT                               | Crater Lake N.P., OR                     | 42.93 | 122.17 | -    | 48 | 2.00 | 20   | 0.060          | 0.008 | 0.070          | 0.031 |

(Continued on next page)

**Table S3 – continued from previous page**

| Population                             | Location/Comments        | Lat   | Long   | Elev | N  | A    | P  | H <sub>o</sub> | (SE)  | H <sub>e</sub> | (SE)  |
|----------------------------------------|--------------------------|-------|--------|------|----|------|----|----------------|-------|----------------|-------|
| 7. Cascade - SHAS                      | Mt. Shasta, CA           | 41.37 | 122.20 | -    | 48 | 2.25 | 15 | 0.083          | 0.009 | 0.091          | 0.039 |
| 8. Cascade - LASS                      | Lassen Volcanic N.P., CA | 40.48 | 121.48 | -    | 48 | 2.00 | 15 | 0.079          | 0.009 | 0.075          | 0.035 |
| 9. Sierra Nevada - ROSE                | Mt. Rose Summit, NV      | 39.32 | 119.90 | -    | 48 | 2.43 | 20 | 0.119          | 0.010 | 0.120          | 0.046 |
| 10. Sierra Nevada - SONO               | Sonora Pass, CA          | 38.33 | 119.65 | -    | 48 | 2.43 | 20 | 0.104          | 0.010 | 0.104          | 0.042 |
| 11. Sierra Nevada - TIOG               | Tioga Pass, CA           | 37.92 | 119.25 | -    | 48 | 2.29 | 20 | 0.087          | 0.009 | 0.090          | 0.039 |
| 12. Sierra Nevada - MOSQ               | Mosquito Lake, CA        | 37.43 | 118.73 | -    | 48 | 2.00 | 20 | 0.091          | 0.009 | 0.100          | 0.041 |
| 13. Rocky Mtns. - JASP                 | Mt. Edith Cavell, AB     | 52.68 | 118.08 | -    | 48 | 2.43 | 25 | 0.080          | 0.009 | 0.088          | 0.036 |
| 14. Rocky Mtns. - PARK                 | Parker Ridge, AB         | 52.18 | 117.12 | -    | 48 | 2.17 | 25 | 0.076          | 0.009 | 0.095          | 0.035 |
| 15. Rocky Mtns. - CABI                 | Libby, MT                | 48.55 | 115.73 | -    | 48 | 2.30 | 25 | 0.082          | 0.009 | 0.113          | 0.037 |
| 16. Rocky Mtns. - GLAC                 | Glacier N.P., MT         | 48.68 | 113.75 | -    | 48 | 2.25 | 30 | 0.094          | 0.009 | 0.117          | 0.040 |
| 17. Rocky Mtns. - JEWL                 | Jewel Basin, MT          | 48.17 | 113.93 | -    | 48 | 2.00 | 20 | 0.090          | 0.009 | 0.088          | 0.035 |
| 18. Rocky Mtns. - FRNT                 | Choteau, MT              | 47.93 | 112.82 | -    | 48 | 2.36 | 25 | 0.108          | 0.010 | 0.111          | 0.039 |
| 19. Rocky Mtns. - NINE                 | Ninemile Divide, MT      | 47.13 | 114.32 | -    | 48 | 2.00 | 25 | 0.083          | 0.009 | 0.099          | 0.033 |
| 20. Rocky Mtns. - WILL                 | Corvallis, MT            | 46.32 | 113.92 | -    | 48 | 2.08 | 20 | 0.083          | 0.009 | 0.103          | 0.037 |
| 21. Rocky Mtns. - TOBA                 | Tobacco Roots, MT        | 45.52 | 112.00 | -    | 48 | 2.09 | 20 | 0.106          | 0.010 | 0.105          | 0.038 |
| 22. Rocky Mtns. - GRAV                 | Gravelly Range, MT       | 44.82 | 111.87 | -    | 48 | 2.25 | 30 | 0.096          | 0.010 | 0.111          | 0.036 |
| 23. Rocky Mtns. - BELT                 | Little Belts, MT         | 46.78 | 110.65 | -    | 48 | 2.09 | 30 | 0.098          | 0.010 | 0.105          | 0.034 |
| 24. Rocky Mtns. - YELL                 | Dunraven Pass, WY        | 44.78 | 110.50 | -    | 48 | 2.29 | 25 | 0.075          | 0.009 | 0.081          | 0.034 |
| 25. Rocky Mtns. - BEAR                 | Beartooth Plateau, WY    | 44.95 | 109.53 | -    | 48 | 2.33 | 25 | 0.086          | 0.009 | 0.106          | 0.038 |
| 26. Rocky Mtns. - TOGW                 | Togwotee Pass, WY        | 43.75 | 110.07 | -    | 48 | 2.14 | 25 | 0.079          | 0.009 | 0.089          | 0.037 |
| 27. Rocky Mtns. - CIDA                 | Yellow Pine, ID          | 45.07 | 115.42 | -    | 48 | 2.50 | 20 | 0.098          | 0.010 | 0.097          | 0.040 |
| 28. Rocky Mtns. - SAWT                 | Galena Summit, ID        | 43.87 | 114.70 | -    | 48 | 2.50 | 25 | 0.107          | 0.010 | 0.110          | 0.040 |
| 29. Great Basin - JARB                 | Jarbridge, NV            | 41.83 | 115.47 | -    | 48 | 2.14 | 25 | 0.077          | 0.009 | 0.090          | 0.035 |
| 30. Great Basin - RUBY                 | Ruby Range, NV           | 40.60 | 115.38 | -    | 48 | 2.00 | 20 | 0.056          | 0.008 | 0.064          | 0.032 |
| <i>Pinus contorta</i> (lodgepole pine) |                          |       |        |      |    |      |    |                |       |                |       |
| (Yeh & Layton, 1979)                   |                          |       |        |      |    |      |    |                |       |                |       |
| Marginal - 32                          | Southern YK              | 62.14 | 136.18 | 671  | 15 | 1.80 | 53 | 0.160          | 0.044 | 0.157          | 0.042 |
| Marginal - 33                          | Southern YK              | 63.18 | 136.28 | 877  | 15 | 1.72 | 44 | 0.165          | 0.049 | 0.144          | 0.044 |

(Continued on next page)

**Table S3 – continued from previous page**

| Population                          | Location/Comments | Lat   | Long   | Elev | N  | A    | P  | H <sub>o</sub> | (SE)  | H <sub>e</sub> | (SE)  |
|-------------------------------------|-------------------|-------|--------|------|----|------|----|----------------|-------|----------------|-------|
| Marginal - 34                       | Southern YK       | 60.41 | 136.11 | 747  | 15 | 1.80 | 52 | 0.125          | 0.032 | 0.138          | 0.038 |
| Marginal - 35                       | Northern BC       | 59.48 | 133.47 | 788  | 15 | 1.80 | 56 | 0.147          | 0.042 | 0.143          | 0.040 |
| Intermediate - 30                   | Northern BC       | 59.59 | 128.33 | 640  | 15 | 1.76 | 52 | 0.149          | 0.044 | 0.150          | 0.043 |
| Intermediate - 31                   | Southern YK       | 61.10 | 129.30 | 884  | 15 | 1.96 | 64 | 0.173          | 0.039 | 0.178          | 0.043 |
| Central - 36                        | Northern BC       | 57.29 | 130.13 | 815  | 15 | 2.12 | 76 | 0.176          | 0.036 | 0.184          | 0.043 |
| Central - 28                        | Northern BC       | 58.40 | 124.10 | 762  | 15 | 1.92 | 64 | 0.184          | 0.043 | 0.178          | 0.043 |
| Central - 71                        | Interior BC       | 50.43 | 119.27 | 1524 | 15 | 2.08 | 68 | 0.189          | 0.045 | 0.169          | 0.037 |
| <b>(Wheeler &amp; Guries, 1982)</b> |                   |       |        |      |    |      |    |                |       |                |       |
| BC - 1                              | Ssp. latifolia    | -     | -      | -    | -  | 1.86 | 70 | -              | -     | 0.114          | 0.026 |
| BC - 4                              | Ssp. latifolia    | -     | -      | -    | -  | 1.69 | 61 | -              | -     | 0.125          | 0.029 |
| WA - 5                              | Ssp. latifolia    | -     | -      | -    | -  | 1.81 | 70 | -              | -     | 0.103          | 0.025 |
| AB - 6                              | Ssp. latifolia    | -     | -      | -    | -  | 1.93 | 73 | -              | -     | 0.128          | 0.028 |
| AB - 7                              | Ssp. latifolia    | -     | -      | -    | -  | 2.24 | 82 | -              | -     | 0.144          | 0.028 |
| AB - 8                              | Ssp. latifolia    | -     | -      | -    | -  | 1.88 | 73 | -              | -     | 0.102          | 0.025 |
| AB - 9                              | Ssp. latifolia    | -     | -      | -    | -  | 1.95 | 70 | -              | -     | 0.120          | 0.027 |
| BC - 10                             | Ssp. latifolia    | -     | -      | -    | -  | 2.04 | 70 | -              | -     | 0.115          | 0.026 |
| YK - 14                             | Ssp. latifolia    | -     | -      | -    | -  | 1.71 | 64 | -              | -     | 0.108          | 0.025 |
| BC - 15                             | Ssp. latifolia    | -     | -      | -    | -  | 1.83 | 70 | -              | -     | 0.114          | 0.028 |
| YK - 16                             | Ssp. latifolia    | -     | -      | -    | -  | 1.76 | 70 | -              | -     | 0.129          | 0.029 |
| YK - 18                             | Ssp. latifolia    | -     | -      | -    | -  | 1.76 | 64 | -              | -     | 0.109          | 0.028 |
| YK - 21                             | Ssp. latifolia    | -     | -      | -    | -  | 1.83 | 79 | -              | -     | 0.113          | 0.028 |
| BC - 22                             | Ssp. latifolia    | -     | -      | -    | -  | 1.83 | 67 | -              | -     | 0.113          | 0.027 |
| CO - 23                             | Ssp. latifolia    | -     | -      | -    | -  | 1.81 | 64 | -              | -     | 0.119          | 0.028 |
| BC - 27                             | Ssp. latifolia    | -     | -      | -    | -  | 1.97 | 76 | -              | -     | 0.111          | 0.025 |
| BC - 29                             | Ssp. latifolia    | -     | -      | -    | -  | 1.86 | 73 | -              | -     | 0.119          | 0.028 |
| WA - 30                             | Ssp. latifolia    | -     | -      | -    | -  | 1.76 | 61 | -              | -     | 0.114          | 0.027 |
| AB - 32                             | Ssp. latifolia    | -     | -      | -    | -  | 1.81 | 64 | -              | -     | 0.105          | 0.025 |
| MT - 34                             | Ssp. latifolia    | -     | -      | -    | -  | 2.09 | 73 | -              | -     | 0.116          | 0.026 |

(Continued on next page)

**Table S3 – continued from previous page**

| Population                               | Location/Comments | Lat   | Long   | Elev | N  | A    | P    | H <sub>o</sub> | (SE) | H <sub>e</sub> | (SE)  |
|------------------------------------------|-------------------|-------|--------|------|----|------|------|----------------|------|----------------|-------|
| YK - 36                                  | Ssp. latifolia    | -     | -      | -    | -  | 1.76 | 61   | -              | -    | 0.130          | 0.031 |
| BC - 37                                  | Ssp. latifolia    | -     | -      | -    | -  | 1.83 | 70   | -              | -    | 0.128          | 0.029 |
| MT - 46                                  | Ssp. latifolia    | -     | -      | -    | -  | 1.67 | 58   | -              | -    | 0.097          | 0.026 |
| YK - 50                                  | Ssp. latifolia    | -     | -      | -    | -  | 1.88 | 67   | -              | -    | 0.144          | 0.030 |
| BC - 45                                  | Ssp. contorta     | -     | -      | -    | -  | 1.88 | 61   | -              | -    | 0.130          | 0.030 |
| BC - 47                                  | Ssp. contorta     | -     | -      | -    | -  | 1.88 | 70   | -              | -    | 0.123          | 0.027 |
| BC - 48                                  | Ssp. contorta     | -     | -      | -    | -  | 1.18 | 64   | -              | -    | 0.125          | 0.029 |
| BC - 49                                  | Ssp. contorta     | -     | -      | -    | -  | 1.57 | 55   | -              | -    | 0.114          | 0.029 |
| WA - 38                                  | Ssp. contorta     | -     | -      | -    | -  | 1.93 | 73   | -              | -    | 0.139          | 0.029 |
| CA - 17                                  | Ssp. murrayana    | -     | -      | -    | -  | 1.86 | 70   | -              | -    | 0.120          | 0.026 |
| OR - 39                                  | Ssp. murrayana    | -     | -      | -    | -  | 2.02 | 76   | -              | -    | 0.128          | 0.028 |
| CA - 40                                  | Ssp. Bolanderi    | -     | -      | -    | -  | 1.62 | 58   | -              | -    | 0.109          | 0.280 |
| <b>(Dancik &amp; Yeh, 1983)</b>          |                   |       |        |      |    |      |      |                |      |                |       |
| Hinton                                   | Hinton, AB        | 53.43 | 117.48 | 1170 | 62 | 3.0  | 52.4 | 0.186          | -    | 0.184          | 0.045 |
| Cypress Hills                            | Cypress Hills, AB | 49.65 | 110.28 | 1410 | 30 | 2.5  | 52.4 | 0.165          | -    | 0.179          | 0.049 |
| Coleman                                  | Coleman, AB       | 49.75 | 114.50 | 1090 | 30 | 2.3  | 52.4 | 0.202          | -    | 0.239          | 0.063 |
| Canmore                                  | Canmore, AB       | 51.10 | 115.28 | 1630 | 30 | 2.4  | 47.6 | 0.187          | -    | 0.241          | 0.061 |
| Lake Abraham                             | Lake Abraham, AB  | 52.25 | 116.45 | 1750 | 30 | 2.3  | 52.4 | 0.179          | -    | 0.201          | 0.054 |
| <b><i>Pinus edulis</i> (pinyon pine)</b> |                   |       |        |      |    |      |      |                |      |                |       |
| <b>(Premoli <i>et al.</i>, 1994)</b>     |                   |       |        |      |    |      |      |                |      |                |       |
| OC-North                                 | Northeastern CO   | -     | -      | 1835 | 25 | 2.1  | 80   | 0.214          | -    | 0.262          | -     |
| OC-Centre                                | Northeastern CO   | -     | -      | 1835 | 25 | 2.0  | 50   | 0.192          | -    | 0.187          | -     |
| OC-East                                  | Northeastern CO   | -     | -      | 1835 | 25 | 1.9  | 60   | 0.220          | -    | 0.231          | -     |
| OC-West                                  | Northeastern CO   | -     | -      | 1835 | 25 | 2.0  | 50   | 0.203          | -    | 0.204          | -     |
| OC-South                                 | Northeastern CO   | -     | -      | 1835 | 25 | 1.9  | 60   | 0.205          | -    | 0.213          | -     |
| Lone Site                                | Northeastern CO   | -     | -      | 2050 | 44 | 2.3  | 50   | 0.164          | -    | 0.219          | -     |
| Bonner Peak                              | Northeastern CO   | -     | -      | 2270 | 43 | 2.1  | 40   | 0.181          | -    | 0.188          | -     |
| Windy Site                               | Northeastern CO   | -     | -      | 2100 | 16 | 1.5  | 40   | 0.150          | -    | 0.179          | -     |

(Continued on next page)

**Table S3 – continued from previous page**

| Population                                         | Location/Comments | Lat   | Long   | Elev | N | A   | P  | H <sub>o</sub> | (SE) | H <sub>e</sub> | (SE)  |
|----------------------------------------------------|-------------------|-------|--------|------|---|-----|----|----------------|------|----------------|-------|
| Hewlett Gulch                                      | Northeastern CO   | -     | -      | 1820 | 9 | 1.6 | 60 | 0.193          | -    | 0.233          | -     |
| <b><i>Pinus monticola</i> (western white pine)</b> |                   |       |        |      |   |     |    |                |      |                |       |
| <b>(Steinhoff <i>et al.</i>, 1983)</b>             |                   |       |        |      |   |     |    |                |      |                |       |
| Interior - 5                                       | Beaver, BC        | 51.55 | 117.48 | 1145 | - | 1.4 | 42 | -              | -    | 0.15           | 0.057 |
| Interior - 58                                      | Hungry Horse, MT  | 48.32 | 113.98 | 1130 | - | 1.7 | 67 | -              | -    | 0.13           | 0.036 |
| Interior - 55                                      | Flower Creek, MT  | 48.38 | 115.57 | 670  | - | 1.8 | 75 | -              | -    | 0.16           | 0.050 |
| Interior - 45                                      | Beaver Creek, ID  | 48.73 | 116.87 | 915  | - | 1.8 | 67 | -              | -    | 0.16           | 0.049 |
| Interior - 49                                      | Crystal Creek, ID | 47.13 | 116.37 | 915  | - | 1.8 | 83 | -              | -    | 0.19           | 0.048 |
| Interior - 52                                      | Elk River, ID     | 46.82 | 116.17 | 915  | - | 1.7 | 67 | -              | -    | 0.13           | 0.032 |
| Interior - 35                                      | Fry Meadow, OR    | 45.78 | 117.82 | 1525 | - | 1.4 | 42 | -              | -    | 0.11           | 0.050 |
| Coastal - 3                                        | Coronation, BC    | 49.00 | 124.00 | 870  | - | 1.8 | 75 | -              | -    | 0.18           | 0.054 |
| Coastal - 4                                        | Victoria, BC      | 48.42 | 123.62 | 350  | - | 1.6 | 58 | -              | -    | 0.15           | 0.060 |
| Coastal - 8                                        | Forks, WA         | 47.93 | 124.37 | 150  | - | 1.2 | 17 | -              | -    | 0.06           | 0.038 |
| Coastal - 10                                       | Humptulips, WA    | 47.30 | 123.95 | 150  | - | 1.1 | 8  | -              | -    | 0.04           | 0.041 |
| Coastal - 12                                       | Everett, WA       | 48.08 | 122.13 | 30   | - | 1.5 | 50 | -              | -    | 0.10           | 0.049 |
| Coastal - 13                                       | Belfair, WA       | 47.48 | 122.90 | 90   | - | 2.0 | 92 | -              | -    | 0.15           | 0.039 |
| North-Central - 16                                 | White Pass, WA    | 46.57 | 121.37 | 1310 | - | 1.6 | 58 | -              | -    | 0.13           | 0.045 |
| North-Central - 23                                 | Mt. Hood, OR      | 45.27 | 121.77 | 975  | - | 1.6 | 58 | -              | -    | 0.13           | 0.050 |
| North-Central - 25                                 | Sweet Home, OR    | 44.42 | 122.17 | 1250 | - | 1.7 | 58 | -              | -    | 0.18           | 0.058 |
| South-Central - 29                                 | La Pine, OR       | 43.80 | 121.68 | 1830 | - | 1.8 | 67 | -              | -    | 0.25           | 0.060 |
| South-Central - 27                                 | Oakridge, OR      | 43.60 | 122.12 | 1370 | - | 1.8 | 67 | -              | -    | 0.16           | 0.049 |
| South-Central - 26                                 | Black Butte, OR   | 43.53 | 122.92 | 1065 | - | 1.8 | 75 | -              | -    | 0.20           | 0.053 |
| South-Central - 29                                 | Glide, OR         | 43.07 | 122.95 | 1160 | - | 1.8 | 75 | -              | -    | 0.23           | 0.052 |
| South-Central - 30                                 | Prospect, OR      | 42.87 | 122.37 | 1525 | - | 1.9 | 75 | -              | -    | 0.21           | 0.052 |
| South-Central - 33                                 | Pinehurst, OR     | 42.20 | 122.30 | 1645 | - | 1.8 | 67 | -              | -    | 0.21           | 0.061 |
| Siskiyou - 31                                      | Chicago Creek, CA | 41.97 | 123.67 | 1295 | - | 1.8 | 58 | -              | -    | 0.23           | 0.069 |
| Siskiyou - 32                                      | Elliot Creek, CA  | 42.00 | 123.00 | 1735 | - | 2.0 | 92 | -              | -    | 0.24           | 0.054 |
| Warner - 34                                        | Lakeview, OR      | 42.10 | 120.28 | 2286 | - | 2.0 | 83 | -              | -    | 0.32           | 0.058 |

(Continued on next page)

**Table S3 – continued from previous page**

| Population                                     | Location/Comments      | Lat   | Long   | Elev | N   | A     | P    | H <sub>o</sub> | (SE) | H <sub>e</sub> | (SE)  |
|------------------------------------------------|------------------------|-------|--------|------|-----|-------|------|----------------|------|----------------|-------|
| Warner - 38                                    | Willow Mtn., CA        | 41.83 | 122.23 | 1980 | -   | 2.3   | 92   | -              | -    | 0.29           | 0.058 |
| Warner - 41                                    | Lake Audrian, CA       | 38.65 | 120.07 | 2225 | -   | 2.2   | 83   | -              | -    | 0.26           | 0.069 |
| Warner - 42                                    | Blue Lakes, CA         | 38.62 | 119.92 | 2530 | -   | 2.0   | 75   | -              | -    | 0.26           | 0.064 |
| <b>(Kim <i>et al.</i>, 2011)</b>               |                        |       |        |      |     |       |      |                |      |                |       |
| ReSt                                           | Revelstoke, BC         | 51.00 | 118.19 | 500  | 27  | 1.606 | 87.9 | -              | -    | 0.194          | -     |
| TeXa                                           | Texada Island, BC      | 48.26 | 113.88 | 1100 | 25  | 1.621 | 90.9 | -              | -    | 0.198          | -     |
| SwCr                                           | Swamp Creek, WA        | 47.59 | 116.03 | 1345 | 29  | 1.667 | 87.9 | -              | -    | 0.208          | -     |
| ElCr                                           | Elya Creek, MT         | 49.70 | 124.37 | 215  | 27  | 1.636 | 84.8 | -              | -    | 0.190          | -     |
| MoSa                                           | Moon Saddle, ID        | 48.57 | 120.78 | 1190 | 22  | 1.576 | 87.9 | -              | -    | 0.187          | -     |
| HoLy                                           | Holly, WA              | 47.57 | 122.92 | 150  | 17  | 1.636 | 89.4 | -              | -    | 0.215          | -     |
| SmCr                                           | Smokey Creek, WA       | 46.02 | 121.68 | 1114 | 21  | 1.621 | 90.9 | -              | -    | 0.204          | -     |
| VeLa                                           | Veda Lake, OR          | 45.26 | 121.76 | 1310 | 26  | 1.727 | 90.9 | -              | -    | 0.233          | -     |
| InCrb                                          | Indian Creek, OR       | 44.36 | 118.79 | 1585 | 25  | 1.758 | 92.4 | -              | -    | 0.274          | -     |
| DeCr                                           | Deer Creek, OR         | 43.25 | 121.86 | 1740 | 28  | 1.894 | 97.0 | -              | -    | 0.316          | -     |
| NaCr                                           | National Creek, OR     | 43.00 | 122.38 | 1150 | 23  | 1.697 | 95.5 | -              | -    | 0.225          | -     |
| FlSp                                           | Fly Catcher Spring, OR | 42.35 | 124.30 | 800  | 27  | 1.773 | 89.4 | -              | -    | 0.275          | -     |
| GaQu                                           | Gasquet, CA            | 41.86 | 123.91 | 435  | 21  | 1.789 | 93.9 | -              | -    | 0.264          | -     |
| LoSt                                           | Lodge Pole Station, CA | 41.83 | 122.21 | 1880 | 22  | 1.773 | 92.4 | -              | -    | 0.289          | -     |
| SpCa                                           | Spur Canyon, CA        | 38.70 | 120.10 | 2500 | 17  | 1.721 | 81.8 | -              | -    | 0.254          | -     |
| <b><i>Pinus ponderosa</i> (ponderosa pine)</b> |                        |       |        |      |     |       |      |                |      |                |       |
| <b>(O'Malley <i>et al.</i>, 1979)</b>          |                        |       |        |      |     |       |      |                |      |                |       |
| OMALLEY-1979                                   | 10 pop., WA, ID, MT    | -     | -      | -    | 47  | 2.25  | -    | -              | -    | 0.123          | -     |
| <b>(Woods <i>et al.</i>, 1983)</b>             |                        |       |        |      |     |       |      |                |      |                |       |
| WOODS-1983                                     | 1 pop., Eastern MT     | -     | -      | -    | 150 | 2.6   | -    | -              | -    | 0.126          | 0.037 |
| <b>(Hamrick <i>et al.</i>, 1979)</b>           |                        |       |        |      |     |       |      |                |      |                |       |
| HAMRICK-1979                                   | 7 pop., Eastern CO     | -     | -      | -    | -   | 2.0   | 68.4 | -              | -    | 0.226          | -     |

(Continued on next page)

**Table S3 – continued from previous page**

| Population                                          | Location/Comments             | Lat | Long | Elev | N   | A    | P    | H <sub>o</sub> | (SE) | H <sub>e</sub> | (SE)  |
|-----------------------------------------------------|-------------------------------|-----|------|------|-----|------|------|----------------|------|----------------|-------|
| <b>(Niebling &amp; Conkle, 1990)</b>                |                               |     |      |      |     |      |      |                |      |                |       |
| Pacific - Warner Mtns.                              | 1 pop., Northern CA           | -   | -    | -    | 65  | 2.39 | 70   | -              | -    | 0.150          | 0.036 |
| Pacific - Mt. Rose                                  | 1 pop., Northern CA           | -   | -    | -    | 55  | 2.29 | 70   | -              | -    | 0.137          | 0.035 |
| North Plateau                                       | 12 pop., Pacific Northwest US | -   | -    | -    | 204 | 2.77 | 64   | -              | -    | 0.178          | 0.041 |
| Rocky Mtns.                                         | 20 pop., US Rocky Mtns.       | -   | -    | -    | 186 | 2.77 | 75   | -              | -    | 0.164          | 0.039 |
| <b><i>Populus tremuloides</i> (trembling aspen)</b> |                               |     |      |      |     |      |      |                |      |                |       |
| <b>(Cheliak &amp; Dancik, 1982)</b>                 |                               |     |      |      |     |      |      |                |      |                |       |
| 1                                                   | AB                            | -   | -    | -    | 32  | 2.0  | 85   | 0.49           | -    | 0.41           | -     |
| 2                                                   | AB                            | -   | -    | -    | 30  | 2.3  | 88   | 0.46           | -    | 0.40           | -     |
| 3                                                   | AB                            | -   | -    | -    | 30  | 2.3  | 88   | 0.49           | -    | 0.44           | -     |
| 4                                                   | AB                            | -   | -    | -    | 30  | 2.3  | 84   | 0.53           | -    | 0.41           | -     |
| 5                                                   | AB                            | -   | -    | -    | 30  | 2.5  | 92   | 0.60           | -    | 0.43           | -     |
| 6                                                   | AB                            | -   | -    | -    | 30  | 2.3  | 85   | 0.52           | -    | 0.42           | -     |
| 7                                                   | AB                            | -   | -    | -    | 40  | 2.4  | 88   | 0.56           | -    | 0.42           | -     |
| <b>(Jelinski &amp; Cheliak, 1992)</b>               |                               |     |      |      |     |      |      |                |      |                |       |
| Prairie I                                           | Waterton Lakes N.P., AB       | -   | -    | 1300 | 37  | 2.5  | 87.5 | 0.30           | -    | 0.315          | 0.042 |
| Prairie II                                          | Waterton Lakes N.P., AB       | -   | -    | 1300 | 25  | 2.4  | 75.0 | 0.35           | -    | 0.258          | 0.047 |
| Akamina                                             | Waterton Lakes N.P., AB       | -   | -    | 2700 | 25  | 2.2  | 81.3 | 0.31           | -    | 0.346          | 0.046 |
| Galwey                                              | Waterton Lakes N.P., AB       | -   | -    | 1810 | 23  | 2.4  | 75.0 | 0.34           | -    | 0.267          | 0.047 |
| Crandall                                            | Waterton Lakes N.P., AB       | -   | -    | 1360 | 22  | 2.4  | 81.3 | 0.33           | -    | 0.306          | 0.056 |
| Copper                                              | Waterton Lakes N.P., AB       | -   | -    | 1400 | 24  | 2.5  | 87.5 | 0.28           | -    | 0.246          | 0.040 |
| Prairie I                                           | Waterton Lakes N.P., AB       | -   | -    | 1300 | 37  | 2.5  | 87.5 | 0.30           | -    | 0.315          | 0.042 |
| Prairie II                                          | Waterton Lakes N.P., AB       | -   | -    | 1300 | 25  | 2.4  | 75.0 | 0.35           | -    | 0.258          | 0.047 |
| Akamina                                             | Waterton Lakes N.P., AB       | -   | -    | 2700 | 25  | 2.2  | 81.3 | 0.31           | -    | 0.346          | 0.046 |
| Galwey                                              | Waterton Lakes N.P., AB       | -   | -    | 1810 | 23  | 2.4  | 75.0 | 0.34           | -    | 0.267          | 0.047 |
| Crandall                                            | Waterton Lakes N.P., AB       | -   | -    | 1360 | 22  | 2.4  | 81.3 | 0.33           | -    | 0.306          | 0.056 |
| Copper                                              | Waterton Lakes N.P., AB       | -   | -    | 1400 | 24  | 2.5  | 87.5 | 0.28           | -    | 0.246          | 0.040 |

(Continued on next page)

**Table S3 – continued from previous page**

| Population                                        | Location/Comments | Lat  | Long  | Elev | N   | A    | P    | H <sub>o</sub> | (SE) | H <sub>e</sub> | (SE) |
|---------------------------------------------------|-------------------|------|-------|------|-----|------|------|----------------|------|----------------|------|
| <b>(Liu &amp; Furnier, 1993)</b>                  |                   |      |       |      |     |      |      |                |      |                |      |
| LIU1993                                           | MI, MN, WI        | -    | -     | -    | 118 | 2.8  | 77   | 0.19           | 0.05 | 0.32           | 0.06 |
| <b>(Lund <i>et al.</i>, 1992)</b>                 |                   |      |       |      |     |      |      |                |      |                |      |
| A                                                 | MN                | -    | -     | -    | 40  | 2.7  | 90   | 0.205          | -    | 0.206          | -    |
| B                                                 | MN                | -    | -     | -    | 38  | 2.7  | 100  | 0.224          | -    | 0.235          | -    |
| C                                                 | MN                | -    | -     | -    | 40  | 2.6  | 90   | 0.205          | -    | 0.215          | -    |
| D                                                 | MN                | -    | -     | -    | 40  | 2.8  | 100  | 0.235          | -    | 0.244          | -    |
| E                                                 | MN                | -    | -     | -    | 40  | 2.4  | 80   | 0.230          | -    | 0.234          | -    |
| F                                                 | MN                | -    | -     | -    | 40  | 2.7  | 100  | 0.195          | -    | 0.212          | -    |
| G                                                 | MN                | -    | -     | -    | 40  | 2.9  | 100  | 0.242          | -    | 0.232          | -    |
| H                                                 | MN                | -    | -     | -    | 29  | 2.3  | 80   | 0.217          | -    | 0.210          | -    |
| I                                                 | MN                | -    | -     | -    | 40  | 2.2  | 80   | 0.197          | -    | 0.193          | -    |
| <b>(Hyun <i>et al.</i>, 1987)</b>                 |                   |      |       |      |     |      |      |                |      |                |      |
| Moosonee                                          | ON                | -    | -     | -    | 19  | 2.5  | 80.0 | 0.108          | -    | 0.248          | -    |
| Kenora                                            | ON                | -    | -     | -    | 29  | 2.9  | 93.3 | 0.119          | -    | 0.233          | -    |
| Cochrane                                          | ON                | -    | -     | -    | 28  | 2.8  | 66.7 | 0.133          | -    | 0.207          | -    |
| Thunder Bay                                       | ON                | -    | -     | -    | 29  | 2.8  | 73.3 | 0.160          | -    | 0.227          | -    |
| Hearst                                            | ON                | -    | -     | -    | 27  | 2.9  | 73.3 | 0.101          | -    | 0.234          | -    |
| Sudbury                                           | ON                | -    | -     | -    | 30  | 2.5  | 86.7 | 0.114          | -    | 0.212          | -    |
| Barrie                                            | ON                | -    | -     | -    | 10  | 2.1  | 73.3 | 0.140          | -    | 0.246          | -    |
| Simcoe                                            | ON                | -    | -     | -    | 28  | 1.9  | 86.7 | 0.127          | -    | 0.270          | -    |
| <b><i>Pseudotsuga menziesii</i> (douglas-fir)</b> |                   |      |       |      |     |      |      |                |      |                |      |
| <b>(El-Kassaby &amp; Ritland, 1996)</b>           |                   |      |       |      |     |      |      |                |      |                |      |
| Alberni                                           | Port Alberni, BC  | 49.2 | 124.8 | -    | 51  | 2.25 | 55   | -              | -    | 0.153          | -    |
| Bowen Island                                      | Bowen Island, BC  | 49.4 | 123.4 | -    | 51  | 2.25 | 55   | -              | -    | 0.162          | -    |
| Cassidy                                           | Cassidy, BC       | 49.1 | 123.9 | -    | 51  | 2.05 | 45   | -              | -    | 0.146          | -    |
| Caycuse                                           | Caycuse, BC       | 48.9 | 124.4 | -    | 51  | 2.25 | 50   | -              | -    | 0.186          | -    |

(Continued on next page)



**Table S3 – continued from previous page**

| Population      | Location/Comments     | Lat  | Long  | Elev | N  | A    | P  | H <sub>o</sub> | (SE) | H <sub>e</sub> | (SE) |
|-----------------|-----------------------|------|-------|------|----|------|----|----------------|------|----------------|------|
| Chehalis        | Chehalis, BC          | 46.7 | 123.0 | -    | 51 | 2.15 | 50 | -              | -    | 0.162          | -    |
| Chilliwack High | Chilliwack, BC        | 49.2 | 121.9 | -    | 51 | 2.25 | 60 | -              | -    | 0.159          | -    |
| Chilliwack Low  | Chilliwack, BC        | 49.2 | 121.9 | -    | 51 | 2.20 | 50 | -              | -    | 0.158          | -    |
| Courtenay       | Courtenay, BC         | 49.7 | 125.0 | -    | 51 | 2.20 | 40 | -              | -    | 0.144          | -    |
| Darrington      | Darrington, WA        | 48.3 | 121.6 | -    | 51 | 2.15 | 40 | -              | -    | 0.122          | -    |
| Denman Island   | Denman Island, BC     | 49.5 | 124.8 | -    | 51 | 2.25 | 55 | -              | -    | 0.188          | -    |
| Duncan          | Duncan, BC            | 48.8 | 123.7 | -    | 51 | 2.15 | 60 | -              | -    | 0.169          | -    |
| Empress Mtn.    | Empress Mtn., BC      | 48.4 | 123.7 | -    | 51 | 2.15 | 50 | -              | -    | 0.181          | -    |
| E. Thurlow      | East Thurlow, BC      | 50.4 | 125.4 | -    | 51 | 2.25 | 65 | -              | -    | 0.164          | -    |
| Forbidden Plat. | Forbidden Plateau, BC | 49.7 | 125.2 | -    | 51 | 2.30 | 50 | -              | -    | 0.177          | -    |
| Franklin R.     | Franklin River, BC    | 49.1 | 124.8 | -    | 51 | 2.10 | 50 | -              | -    | 0.151          | -    |
| Gold River      | Gold River, BC        | 49.8 | 126.1 | -    | 51 | 2.10 | 50 | -              | -    | 0.152          | -    |
| Granite Falls   | Granite Falls, WA     | 48.1 | 122.0 | -    | 51 | 2.10 | 40 | -              | -    | 0.139          | -    |
| Haney           | Haney, BC             | 49.2 | 122.6 | -    | 51 | 2.10 | 55 | -              | -    | 0.160          | -    |
| Harrison Lake   | Harrison Lake, BC     | 49.3 | 121.8 | -    | 51 | 2.05 | 55 | -              | -    | 0.166          | -    |
| Hernando Is.    | Hernando Island, BC   | 50.0 | 124.9 | -    | 51 | 2.05 | 65 | -              | -    | 0.181          | -    |
| Hoh             | Hoh, WA               | 47.9 | 123.9 | -    | 51 | 2.30 | 70 | -              | -    | 0.181          | -    |
| Hope            | Hope, BC              | 49.4 | 121.4 | -    | 51 | 2.10 | 50 | -              | -    | 0.126          | -    |
| Jervis          | Jervis Inlet, BC      | 50.2 | 124.0 | -    | 51 | 2.15 | 50 | -              | -    | 0.164          | -    |
| Jeune Landing   | Jeune Landing, BC     | 50.4 | 127.5 | -    | 51 | 2.15 | 55 | -              | -    | 0.185          | -    |
| Jordan River    | Jordan River, BC      | 48.4 | 124.0 | -    | 51 | 2.20 | 55 | -              | -    | 0.169          | -    |
| Kaouk River     | Kaouk River, BC       | 50.1 | 127.1 | -    | 51 | 2.15 | 55 | -              | -    | 0.189          | -    |
| Klinaklini High | Klinaklini, BC        | 51.3 | 125.8 | -    | 51 | 2.00 | 55 | -              | -    | 0.190          | -    |
| Klinaklini Low  | Klinaklini, BC        | 51.3 | 125.8 | -    | 51 | 2.00 | 65 | -              | -    | 0.157          | -    |
| Kelsey Bay      | Kelsey Bay, BC        | 50.4 | 126.0 | -    | 51 | 2.10 | 55 | -              | -    | 0.160          | -    |
| Kennedy Lake    | Kennedy Lake, BC      | 49.0 | 125.6 | -    | 51 | 1.75 | 45 | -              | -    | 0.138          | -    |
| Malcolm Island  | Malcolm Island, BC    | 50.6 | 127.0 | -    | 51 | 1.90 | 40 | -              | -    | 0.143          | -    |
| Mead Cr.        | Mead Creek, BC        | 48.8 | 124.1 | -    | 51 | 2.35 | 50 | -              | -    | 0.181          | -    |
| Nimpkish        | Nimpkish, BC          | 50.3 | 126.9 | -    | 51 | 2.15 | 65 | -              | -    | 0.169          | -    |

(Continued on next page)

**Table S3 – continued from previous page**

| Population                        | Location/Comments          | Lat         | Long         | Elev | N   | A    | P     | H <sub>o</sub> | (SE) | H <sub>e</sub> | (SE)  |
|-----------------------------------|----------------------------|-------------|--------------|------|-----|------|-------|----------------|------|----------------|-------|
| Nanaimo L.                        | Nanaimo Lake, BC           | <i>49.1</i> | <i>124.2</i> | -    | 51  | 2.15 | 45    | -              | -    | 0.166          | -     |
| Parksville                        | Parksville, BC             | <i>49.3</i> | <i>124.3</i> | -    | 51  | 2.20 | 55    | -              | -    | 0.146          | -     |
| Pitt River                        | Pitt River, BC             | <i>49.3</i> | <i>122.6</i> | -    | 51  | 2.05 | 50    | -              | -    | 0.171          | -     |
| Port Hardy                        | Port Hardy, BC             | <i>50.7</i> | <i>127.5</i> | -    | 51  | 2.20 | 55    | -              | -    | 0.198          | -     |
| Powell River                      | Powell River, BC           | <i>49.9</i> | <i>124.6</i> | -    | 51  | 2.15 | 50    | -              | -    | 0.161          | -     |
| Quadra Island                     | Quadra Island, BC          | <i>50.1</i> | <i>125.3</i> | -    | 51  | 2.05 | 65    | -              | -    | 0.167          | -     |
| San Juan R.                       | San Juan River, BC         | <i>48.5</i> | <i>124.0</i> | -    | 51  | 2.15 | 50    | -              | -    | 0.157          | -     |
| Sechelt                           | Sechelt, BC                | <i>49.5</i> | <i>123.8</i> | -    | 51  | 2.05 | 50    | -              | -    | 0.158          | -     |
| Shelton                           | Shelton, WA                | <i>47.2</i> | <i>123.1</i> | -    | 51  | 2.10 | 45    | -              | -    | 0.148          | -     |
| Sooke                             | Sooke, BC                  | <i>48.4</i> | <i>123.7</i> | -    | 51  | 2.20 | 55    | -              | -    | 0.161          | -     |
| Squamish                          | Squamish, BC               | <i>49.7</i> | <i>123.2</i> | -    | 51  | 2.20 | 55    | -              | -    | 0.169          | -     |
| Stella Lake                       | Stella Lake, BC            | <i>50.3</i> | <i>125.5</i> | -    | 51  | 2.15 | 45    | -              | -    | 0.160          | -     |
| Tahsis                            | Tahsis, BC                 | <i>49.9</i> | <i>126.7</i> | -    | 51  | 2.15 | 50    | -              | -    | 0.154          | -     |
| Texada Island                     | Texada Island, BC          | <i>49.7</i> | <i>124.6</i> | -    | 51  | 2.05 | 55    | -              | -    | 0.171          | -     |
| Tinhat Mtn.                       | Tinhat Mtn., BC            | <i>49.9</i> | <i>124.4</i> | -    | 51  | 2.25 | 45    | -              | -    | 0.163          | -     |
| Toba River                        | Toba River, BC             | <i>50.5</i> | <i>124.3</i> | -    | 51  | 2.25 | 55    | -              | -    | 0.172          | -     |
| <b>(Yeh &amp; O'Malley, 1980)</b> |                            |             |              |      |     |      |       |                |      |                |       |
| I                                 | South Vancouver Island, BC | 48.55       | 124.08       | 244  | 100 | 2.33 | 42.86 | -              | -    | 0.156          | 0.041 |
| II                                | South Vancouver Island, BC | 48.87       | 123.75       | 457  | 100 | 2.33 | 57.14 | -              | -    | 0.156          | 0.035 |
| III                               | Skagit Valley, BC          | 49.23       | 121.23       | 930  | 100 | 2.29 | 52.38 | -              | -    | 0.168          | 0.040 |
| IV                                | Lower Mainland, BC         | 49.25       | 122.35       | 152  | 100 | 2.29 | 47.62 | -              | -    | 0.161          | 0.041 |
| V                                 | Hope, BC                   | 49.50       | 121.35       | 884  | 100 | 2.10 | 57.14 | -              | -    | 0.149          | 0.039 |
| VI                                | Halfmoon Bay, BC           | 49.50       | 123.87       | 175  | 100 | 2.34 | 47.62 | -              | -    | 0.139          | 0.038 |
| VII                               | North Vancouver Island, BC | 49.87       | 125.83       | 250  | 100 | 2.14 | 47.62 | -              | -    | 0.142          | 0.036 |
| VIII                              | North Vancouver Island, BC | 50.25       | 125.73       | 137  | 100 | 2.05 | 47.62 | -              | -    | 0.140          | 0.037 |
| IX                                | West Lillooet, BC          | 50.53       | 122.47       | 457  | 100 | 1.91 | 61.91 | -              | -    | 0.167          | 0.041 |
| X                                 | West Lillooet, BC          | 50.57       | 122.53       | 1067 | 100 | 2.29 | 57.14 | -              | -    | 0.184          | 0.042 |
| XI                                | Bella Coola, BC            | 52.42       | 126.25       | 244  | 100 | 2.05 | 47.62 | -              | -    | 0.140          | 0.041 |

(Continued on next page)

**Table S3 – continued from previous page**

| Population                                                                   | Location/Comments          | Lat    | Long    | Elev | N   | A    | P     | H <sub>o</sub> | (SE) | H <sub>e</sub> | (SE)  |
|------------------------------------------------------------------------------|----------------------------|--------|---------|------|-----|------|-------|----------------|------|----------------|-------|
| <b>(Hamrick <i>et al.</i>, 1979)</b>                                         |                            |        |         |      |     |      |       |                |      |                |       |
| YEH                                                                          | 11 pop., Interior BC       | -      | -       | -    | -   | 2.23 | -     | -              | -    | 0.180          | -     |
| MORRIS                                                                       | 11 pop., Coastal CA        | -      | -       | -    | -   | 3.17 | 74.2  | -              | -    | 0.332          | -     |
| CONKLE                                                                       | 1 pop., Interior CA        | -      | -       | -    | -   | 1.78 | 100   | -              | -    | 0.330          | -     |
| HAMRICK                                                                      | 5 pop., Eastern CO         | -      | -       | -    | -   | 1.86 | 64.0  | -              | -    | 0.264          | -     |
| <b><i>Sequoia sempervirens</i> (coast redwood) *not included in analysis</b> |                            |        |         |      |     |      |       |                |      |                |       |
| <b>(Rogers, 1994)</b>                                                        |                            |        |         |      |     |      |       |                |      |                |       |
| High Rock River Access                                                       | Humboldt Redwoods S.P., CA | -      | -       | 50   | 121 | 3.00 | 80    | -              | -    | -              | -     |
| Kent Grove                                                                   | Humboldt Redwoods S.P., CA | -      | -       | 55   | 121 | 3.25 | 92    | -              | -    | -              | -     |
| Grasshopper Hill                                                             | Humboldt Redwoods S.P., CA | -      | -       | 213  | 121 | 3.25 | 83    | -              | -    | -              | -     |
| Squaw Creek Ridge                                                            | Humboldt Redwoods S.P., CA | -      | -       | 210  | 121 | 2.92 | 75    | -              | -    | -              | -     |
| <b><i>Thuja plicata</i> (western redcedar)</b>                               |                            |        |         |      |     |      |       |                |      |                |       |
| <b>(Yeh, 1988)</b>                                                           |                            |        |         |      |     |      |       |                |      |                |       |
| 1 - Cowichan Lake                                                            | Interior BC                | 48.817 | 124.167 | 161  | 20  | 1.16 | 15.79 | 0.44           | -    | 0.050          | 0.031 |
| 2 - Salmo                                                                    | Interior BC                | 49.183 | 117.250 | 610  | 30  | 1.16 | 15.79 | 0.32           | -    | 0.038          | 0.026 |
| 3 - Tashme                                                                   | Interior BC                | 49.333 | 121.283 | 734  | 30  | 1.16 | 15.79 | 0.42           | -    | 0.036          | 0.026 |
| 4 - Kootney Lake                                                             | Interior BC                | 49.667 | 116.667 | 532  | 30  | 1.21 | 15.79 | 0.55           | -    | 0.051          | 0.031 |
| 5 - Kamloops                                                                 | Interior BC                | 50.700 | 120.333 | 344  | 30  | 1.16 | 15.79 | 0.32           | -    | 0.035          | 0.026 |
| 6 - Revelstoke                                                               | Interior BC                | 51.033 | 118.250 | 610  | 30  | 1.11 | 10.53 | 0.30           | -    | 0.036          | 0.027 |
| 7 - Adams Lake                                                               | Interior BC                | 51.217 | 119.500 | 404  | 30  | 1.21 | 21.05 | 0.29           | -    | 0.037          | 0.026 |
| 8 - Quesnel Lake                                                             | Interior BC                | 52.617 | 120.967 | 697  | 30  | 1.16 | 15.79 | 0.24           | -    | 0.031          | 0.026 |
| <b>(El-Kassaby <i>et al.</i>, 1994)</b>                                      |                            |        |         |      |     |      |       |                |      |                |       |
| Strait of Juan De Fuca                                                       | 2 pop., Van Isl & BC Coast | -      | -       | -    | 28  | 1.0  | 12    | -              | -    | 0.06           | -     |
| <b>(Copes, 1981)</b>                                                         |                            |        |         |      |     |      |       |                |      |                |       |
| COPEs                                                                        | 5 pop., WA, OR             | -      | -       | -    | 49  | 1.0  | 0     | 0              | 0    | 0              | 0     |

(Continued on next page)

**Table S3 – continued from previous page**

| Population                                         | Location/Comments   | Lat    | Long    | Elev | N  | A   | P    | H <sub>o</sub> | (SE)  | H <sub>e</sub> | (SE)  |
|----------------------------------------------------|---------------------|--------|---------|------|----|-----|------|----------------|-------|----------------|-------|
| <b><i>Tsuga heterophylla</i> (western hemlock)</b> |                     |        |         |      |    |     |      |                |       |                |       |
| <b>(El-Kassaby <i>et al.</i>, 2003)</b>            |                     |        |         |      |    |     |      |                |       |                |       |
| OG-TSUGHET                                         | Campbell River, BC  | 49.917 | 125.417 | 795  | 30 | 1.6 | 38.1 | 0.098          | -     | 0.113          | -     |
| <b>(Wellman, 2004)</b>                             |                     |        |         |      |    |     |      |                |       |                |       |
| HOLBERG                                            | Holberg, BC         | 50.38  | 128.05  | 92   | 49 | 2.0 | 50.0 | 0.143          | 0.071 | 0.171          | 0.051 |
| TOBA                                               | Toba River, BC      | 50.30  | 124.10  | 366  | 49 | 1.9 | 50.0 | 0.149          | 0.072 | 0.146          | 0.045 |
| UCONA                                              | Ucona River, BC     | 49.40  | 126.00  | 475  | 49 | 1.9 | 50.0 | 0.131          | 0.069 | 0.145          | 0.045 |
| FLEET                                              | Fleet River, BC     | 48.38  | 124.04  | 370  | 50 | 1.6 | 28.6 | 0.117          | 0.071 | 0.132          | 0.054 |
| SOMBRIO                                            | Sombrio Creek, BC   | 48.32  | 124.18  | 365  | 50 | 1.6 | 42.9 | 0.143          | 0.075 | 0.147          | 0.052 |
| CAMPER                                             | Camper Creek, BC    | 48.34  | 124.30  | 300  | 50 | 1.4 | 28.6 | 0.119          | 0.075 | 0.114          | 0.051 |
| SECHELT                                            | Sechelt, BC         | -      | -       | -    | 52 | 1.6 | 42.9 | 0.160          | 0.076 | 0.148          | 0.049 |
| NANAIMO                                            | Nanimo River, BC    | 49.00  | 124.10  | 550  | 50 | 1.9 | 35.7 | 0.140          | 0.072 | 0.131          | 0.046 |
| UBC                                                | UBC Res. Forest, BC | 49.17  | 122.33  | 275  | 49 | 1.7 | 28.6 | 0.112          | 0.073 | 0.137          | 0.054 |
| KAOUK                                              | Kaouk, BC           | 50.05  | 126.59  | 60   | 50 | 1.6 | 42.9 | 0.149          | 0.075 | 0.147          | 0.053 |
| UNKNOWN                                            | Unknown natural, BC | 48.50  | 123.45  | 600  | 49 | 1.5 | 42.9 | 0.161          | 0.079 | 0.131          | 0.048 |
| <b><i>Tsuga mertensia</i> (mountain hemlock)</b>   |                     |        |         |      |    |     |      |                |       |                |       |
| <b>(Ally <i>et al.</i>, 2000)</b>                  |                     |        |         |      |    |     |      |                |       |                |       |
| A - Meade Crk.                                     | Meade Crk. , BC     | 48.55  | 124.05  | 1067 | 40 | 1.9 | 36.8 | -              | -     | 0.092          | 0.026 |
| B - Wakeman High                                   | Wakeman High , BC   | 51.10  | 126.25  | 1100 | 40 | 1.7 | 42.1 | -              | -     | 0.097          | 0.028 |
| C - Hanna Ridge                                    | Hanna Ridge , BC    | 56.18  | 129.20  | 700  | 40 | 1.5 | 31.6 | -              | -     | 0.065          | 0.023 |
| D - Wakeman Low                                    | Wakeman Low , BC    | 51.17  | 126.17  | 600  | 40 | 1.6 | 42.1 | -              | -     | 0.084          | 0.025 |
| E - Garbage Crk.                                   | Garbage Crk. , BC   | 48.33  | 124.06  | 850  | 40 | 1.6 | 31.6 | -              | -     | 0.106          | 0.040 |
| F - Mission                                        | Mission , BC        | 49.18  | 122.26  | 900  | 40 | 1.7 | 31.6 | -              | -     | 0.122          | 0.042 |
| G - Lyon Lk.                                       | Lyon Lk. , BC       | 49.39  | 123.54  | 1005 | 40 | 1.4 | 26.3 | -              | -     | 0.068          | 0.028 |
| H - Parksville                                     | Parksville , BC     | 49.16  | 124.33  | 824  | 40 | 1.6 | 31.6 | -              | -     | 0.102          | 0.033 |
| I - Mayo Crk.                                      | Mayo Crk. , BC      | 54.47  | 129.02  | 683  | 40 | 1.7 | 36.8 | -              | -     | 0.088          | 0.027 |
| J - Zeballos                                       | Zeballos , BC       | 50.10  | 126.47  | 700  | 40 | 1.3 | 21.1 | -              | -     | 0.050          | 0.025 |
| K - Kearsley Crk.                                  | Kearsley Crk. , BC  | 49.19  | 122.22  | 1280 | 40 | 1.7 | 42.1 | -              | -     | 0.106          | 0.036 |

(Continued on next page)

**Table S3 – continued from previous page**

| Population        | Location/Comments  | Lat   | Long   | Elev | N  | A   | P    | H <sub>o</sub> | (SE) | H <sub>e</sub> | (SE)         |
|-------------------|--------------------|-------|--------|------|----|-----|------|----------------|------|----------------|--------------|
| L - Blue Ox Crk.  | Blue Ox Crk. , BC  | 50.18 | 127.16 | 660  | 40 | 1.2 | 10.5 | -              | -    | 0.056          | <i>0.036</i> |
| M - Hkusam Mt.    | Hkusam Mt. , BC    | 50.20 | 125.50 | 950  | 40 | 1.4 | 31.6 | -              | -    | 0.075          | <i>0.028</i> |
| N - Port Alice    | Port Alice , BC    | 50.24 | 124.27 | 750  | 40 | 1.4 | 26.3 | -              | -    | 0.086          | <i>0.035</i> |
| O - Sale Mt.      | Sale Mt. , BC      | 51.10 | 118.10 | 1700 | 40 | 1.2 | 10.5 | -              | -    | 0.050          | <i>0.034</i> |
| P - HODOO Crk.    | HODOO Crk. , BC    | 51.20 | 125.32 | 1250 | 40 | 1.6 | 31.6 | -              | -    | 0.095          | <i>0.030</i> |
| Q - Copper Canyon | Copper Canyon , BC | 48.56 | 124.13 | 1100 | 40 | 1.8 | 47.4 | -              | -    | 0.120          | <i>0.057</i> |
| R - Ashley Crk.   | Ashley Crk. , BC   | 50.01 | 123.33 | 1000 | 40 | 1.7 | 36.8 | -              | -    | 0.109          | <i>0.034</i> |
| S - Woss Lk.      | Woss Lk. , BC      | 50.07 | 126.35 | 900  | 40 | 1.6 | 36.8 | -              | -    | 0.082          | <i>0.027</i> |

## References

- Ally, D., El-Kassaby, Y. A., & Ritland, K. 2000. Genetic diversity, differentiation and mating systems in mountain hemlock (*Tsuga mertensia*) across British Columbia. *Forest Genetics*, **7**(2), 97–108.
- Bruederle, L. P., Tomback, D. F., Kelly, K. K., & Hardwick, R. C. 1998. Population genetic structure in a bird-dispersed pine, *Pinus albicaulis* (Pinaceae). *Canadian Journal of Botany-Revue Canadienne De Botanique*, **76**(1), 83–90.
- Cheliak, W. M., & Dancik, B. P. 1982. Genic diversity of natural populations of a clone-forming tree *Populus tremuloides*. *Canadian Journal of Genetics and Cytology*, **24**(5), 611–616.
- Copes, D. L. 1981. Isoenzyme Uniformity in Western Red Cedar Seedlings from Oregon and Washington. *Canadian Journal of Forest Research-Revue Canadienne De Recherche Forestiere*, **11**(2), 451–453.
- Dancik, B. P., & Yeh, F. C. 1983. Allozyme Variability and Evolution of Lodgepole Pine (*Pinus-Contorta* Var *Latifolia*) and Jack Pine (*Pinus-Banksiana*) in Alberta. *Canadian Journal of Genetics and Cytology*, **25**(1), 57–64.
- Davidson, R. H., & El Kassaby, Y. A. 1997. Genetic diversity and gene conservation of Pacific Silver Fir (*Abies amabilis*) on Vancouver Island, British Columbia. *Forest Genetics*, **4**(2), 85–98.
- El-Kassaby, Y. A., & Ritland, K. 1996. Genetic variation in low elevation Douglas-fir of British Columbia and its relevance to gene conservation. *Biodiversity and Conservation*, **5**(6), 779–794.
- El-Kassaby, Y. A., Russell, J., & Ritland, K. 1994. Mixed Mating in an Experimental Population of Western Red Cedar, *Thuja-Plicata*. *Journal of Heredity*, **85**(3), 227–231.
- El-Kassaby, Y. A., Dunsworth, B. G., & Krakowski, J. 2003. Genetic evaluation of alternative silvicultural systems in coastal montane forests: western hemlock and amabilis fir. *Theoretical and Applied Genetics*, **107**(4), 598–610.
- Ettl, G. J., & Peterson, D. L. 2001. Genetic variation of subalpine fir (*Abies lasiocarpa* (HOOK.) NUTT.) in the Olympic Mountains, WA, USA. *Silvae Genetica*, **50**(3-4), 145–153.
- Fins, L., & Seeb, L. W. 1986. Genetic variation in allozymes of western larch. *Canadian Journal of Forest Research-Revue Canadienne De Recherche Forestiere*, **16**(5), 1013–1018.
- Furnier, G. R., Stine, M., Mohn, C. A., & Clyde, M. A. 1991. Geographic Patterns of Variation in Allozymes and Height Growth in White Spruce. *Canadian Journal of Forest Research-Revue Canadienne De Recherche Forestiere*, **21**(5), 707–712.
- Godt, M. J. W., Hamrick, J. L., Edwards-Burke, M. A., & Williams, J. H. 2001. Comparisons of genetic diversity in white spruce (*Picea glauca*) and jack pine (*Pinus banksiana*) seed orchards with natural populations. *Canadian Journal of Forest Research-Revue Canadienne De Recherche Forestiere*, **31**(6), 943–949.
- Hamrick, J. L., Mitton, J. B., & Linhart, Y. B. 1979. Levels of genetic variation in trees: influence of life history characteristics. In: Conkle, M. T. (ed), *Isozymes of North American Forest Trees and Forest Insects*. Berkeley, CA: USDA Forest Service, Berkeley, CA.
- Harry, D. E. 1984. *Genetic structure of incense cedar (Calocedrus decurrens) populations*. Ph.D. thesis.
- Hyun, J. O., Rajora, O. P., & Zsuffa, L. 1987. Genetic-Variation in Trembling Aspen in Ontario Based on Isozyme Studies. *Canadian Journal of Forest Research-Revue Canadienne De Recherche Forestiere*, **17**(9), 1134–1138.
- Iddrisu, M. N., & Ritland, K. 2004. Genetic variation, population structure, and mating system in bigleaf maple (*Acer macrophyllum* Pursh). *Canadian Journal of Botany-Revue Canadienne De Botanique*, **82**(12), 1817–1825.
- Isabel, N., Beaulieu, J., & Bousquet, J. 1995. Complete Congruence between Gene Diversity Estimates Derived from Genotypic Data at Enzyme and Random Amplified Polymorphic DNA Loci in Black Spruce. *Proceedings of the National Academy of Sciences of the United States of America*, **92**(14), 6369–6373.

- Jaquish, B., & El-Kassaby, Y. A. 1998. Genetic variation of western larch in British Columbia and its conservation. *Journal of Heredity*, **89**(3), 248–253.
- Jelinski, D. E., & Cheliak, W. M. 1992. Genetic Diversity and Spatial Subdivision of *Populus-Tremuloides* (Salicaceae) in a Heterogeneous Landscape. *American Journal of Botany*, **79**(7), 728–736.
- Jorgensen, S. M., & Hamrick, J. L. 1997. Biogeography and population genetics of whitebark pine, *Pinus albicaulis*. *Canadian Journal of Forest Research-Revue Canadienne De Recherche Forestiere*, **27**(10), 1574–1585.
- Kim, M. S., Richardson, B. A., McDonald, G. I., & Klopfenstein, N. B. 2011. Genetic diversity and structure of western white pine (*Pinus monticola*) in North America: a baseline study for conservation, restoration, and addressing impacts of climate change. *Tree Genetics & Genomes*, **7**(1), 11–21.
- Ledig, F. T., Hodgskiss, P. D., & Johnson, D. R. 2006. The structure of genetic diversity in Engelmann spruce and a comparison with blue spruce. *Canadian Journal of Botany-Revue Canadienne De Botanique*, **84**(12), 1806–1828.
- Liu, Z., & Furnier, G. R. 1993. Comparison of Allozyme, Rflp, and Rapd Markers for Revealing Genetic-Variation within and between Trembling Aspen and Bigtooth Aspen. *Theoretical and Applied Genetics*, **87**(1-2), 97–105.
- Lund, S. T., Furnier, G. R., & Mohn, C. A. 1992. Isozyme Variation in Quaking Aspen in Minnesota. *Canadian Journal of Forest Research-Revue Canadienne De Recherche Forestiere*, **22**(4), 521–524.
- Niebling, C. R., & Conkle, M. T. 1990. Diversity of Washoe Pine and Comparisons with Allozymes of Ponderosa Pine Races. *Canadian Journal of Forest Research-Revue Canadienne De Recherche Forestiere*, **20**(3), 298–308.
- O'Malley, D. M., Allendorf, F. W., & Blake, G. M. 1979. Inheritance of isozyme variation and heterozygosity in *Pinus ponderosa*. *Biochemical Genetics*, **17**(3/4), 233–250.
- O'Reilly, G. J., Parker, W. H., & Cheliak, W. M. 1985. Isozyme Differentiation of Upland and Lowland *Picea-Mariana* Stands in Northern Ontario. *Silvae Genetica*, **34**(6), 214–221.
- Premoli, A. C., Chischilly, S., & Mitton, J. B. 1994. Levels of Genetic Variation Captured by 4 Descendant Populations of Pinyon Pine (*Pinus Edulis* Engelm.). *Biodiversity and Conservation*, **3**(4), 331–340.
- Rajora, O. P., & Pluhar, S. A. 2003. Genetic diversity impacts of forest fires, forest harvesting, and alternative reforestation practices in black spruce (*Picea mariana*). *Theoretical and Applied Genetics*, **106**(7), 1203–1212.
- Ritland, C., Pape, T., & Ritland, K. 2001. Genetic structure of yellow cedar (*Chamaecyparis nootkatensis*). *Canadian Journal of Botany-Revue Canadienne De Botanique*, **79**(7), 822–828.
- Rogers, D L. 1994. *Spatial patterns of allozyme variation and clonal structure in coast redwood (Sequoia sempervirens)*. Ph.D. thesis.
- Steinhoff, R. J., Joyce, D. G., & Fins, L. 1983. Isozyme Variation in *Pinus-Monticola*. *Canadian Journal of Forest Research-Revue Canadienne De Recherche Forestiere*, **13**(6), 1122–1132.
- Wellman, H. F. 2004. *The genetics of selective breeding in western hemlock Tsuga heterophylla*. Ph.D. thesis.
- Wheeler, N. C., & Guries, R. P. 1982. Population-Structure, Genic Diversity, and Morphological Variation in *Pinus-Contorta* Dougl. *Canadian Journal of Forest Research-Revue Canadienne De Recherche Forestiere*, **12**(3), 595–606.
- Woods, J. H., Blake, G. M., & Allendorf, F. W. 1983. Amount and Distribution of Isozyme Variation in Ponderosa Pine from Eastern Montana. *Silvae Genetica*, **32**(5-6), 151–157.
- Xie, C. Y., El-Kassaby, Y. A., & Ying, C. C. 2002. Genetics of red alder (*Alnus Rubra* Bong.) populations in British Columbia and its implications for gene resources management. *New Forests*, **24**(2), 97–112.

- Yeh, F. C. 1988. Isozyme Variation of Thuja-Plicata (Cupressaceae) in British-Columbia. *Biochemical Systematics and Ecology*, **16**(4), 373–377.
- Yeh, F. C., & El-Kassaby, Y. A. 1980. Enzyme Variation in Natural-Populations of Sitka Spruce (Picea-Sitchensis) .1. Genetic-Variation Patterns among Trees from 10 Iufro Provenances. *Canadian Journal of Forest Research-Revue Canadienne De Recherche Forestiere*, **10**(3), 415–422.
- Yeh, F. C., & Hu, X. S. 2005. Genetic structure and migration from mainland to island populations in Abies procera Rehd. *Genome*, **48**(3), 461–473.
- Yeh, F. C., & Layton, C. 1979. Organization of Genetic-Variability in Central and Marginal Populations of Lodgepole Pine Pinus-Contorta Spp Latifolia. *Canadian Journal of Genetics and Cytology*, **21**(4), 487–503.
- Yeh, F. C. H., & O'Malley, D. 1980. Enzyme Variations in Natural-Populations of Douglas-Fir, Pseudotsuga Menziesii (Mirb) Franco, from British-Columbia .1. Genetic-Variation Patterns in Coastal Populations. *Silvae Genetica*, **29**(3-4), 83–92.
