# Supplementary material
Source: PubMed Central journal article supplement (PMC4375868)
Supplement: rspb20142903supp4.pdf [file rspb20142903supp4.pdf]

**Table S4:** Alternative splits for each node of the regression tree (figure 2), explaining allelic richness (A) and expected heterozygosity ( $H_e$ ). Alternative splitting variables are listed (Variable), as are the percent variances explained by each split (VarEx) and to which side of the regression tree each group splits at each node.

| Variable                          | VarEx | To the left             | To the right            |
|-----------------------------------|-------|-------------------------|-------------------------|
| <hr/>                             |       |                         |                         |
| Allelic richness (A)              |       |                         |                         |
| <hr/>                             |       |                         |                         |
| Split 1                           |       |                         |                         |
| Glacial range area                | 66.1% | <3.5e5 km <sup>2</sup>  | ≥ 3.5e5 km <sup>2</sup> |
| Glacial refugia count             | 47.4% | <21.9                   | ≥ 21.9                  |
| Modern range patch count          | 41.8% | <58                     | ≥ 58                    |
| Modern range area                 | 37.5% | <8.4e5 km <sup>2</sup>  | ≥ 8.4e5 km <sup>2</sup> |
| Modern range contiguity           | 32.3% | ≥ 0.86                  | <0.86                   |
| Split 2                           |       |                         |                         |
| Glacial range contiguity          | 8.6%  | <0.85                   | ≥ 0.85                  |
| Modern range contiguity           | 8.3%  | <0.86                   | ≥ 0.86                  |
| Glacial refugia count             | 8.2%  | ≥ 15                    | <15                     |
| Glacial range area                | 7.4%  | <1.4e5 km <sup>2</sup>  | ≥ 1.4e5 km <sup>2</sup> |
| Modern range area                 | 6.6%  | ≥ 5.5e5 km <sup>2</sup> | <5.5e5 km <sup>2</sup>  |
| Split 3                           |       |                         |                         |
| Dispersal mechanism               | 3.7%  | all others              | wind                    |
| Glacial refugia count             | 3.6%  | <64                     | ≥ 64                    |
| Glacial contiguity                | 2.6%  | ≥ 0.84                  | <0.84                   |
| Modern range patch count          | 1.6%  | <101                    | ≥ 101                   |
| Glacial range area                | 1.6%  | <9.7e5 km <sup>2</sup>  | ≥ 9.7e5 km <sup>2</sup> |
| <hr/>                             |       |                         |                         |
| Expected heterozygosity ( $H_e$ ) |       |                         |                         |
| <hr/>                             |       |                         |                         |
| Split 1                           |       |                         |                         |
| Glacial refugia count             | 26.7% | <64                     | ≥ 64                    |
| Glacial range contiguity          | 25.2% | ≥ 0.84                  | <0.84                   |
| Modern range contiguity           | 14.7% | ≥ 0.86                  | <0.86                   |
| Glacial range area                | 12.3% | <2.1e5 km <sup>2</sup>  | ≥ 2.1e5 km <sup>2</sup> |
| Modern range patch count          | 9.4%  | <101                    | ≥ 101                   |
| Split 2                           |       |                         |                         |
| Modern range area                 | 20.8% | ≥ 4.3e5 km <sup>2</sup> | <4.3e5 km <sup>2</sup>  |
| Glacial range contiguity          | 13.1% | ≥ 0.86                  | <0.86                   |
| Modern range contiguity           | 7.3%  | ≥ 0.85                  | <0.85                   |
| Modern range patch count          | 7.2%  | ≥ 20                    | <20                     |
| Glacial range area                | 4.1%  | ≥ 0.8e5 km <sup>2</sup> | <0.8e5 km <sup>2</sup>  |
| Split 3                           |       |                         |                         |
| Glacial range area                | 16.3% | <1.4e5 km <sup>2</sup>  | ≥ 1.4e5 km <sup>2</sup> |
| Glacial refugia count             | 7.5%  | <22                     | ≥ 22                    |
| Succession                        | 7.1%  | early, late             | middle                  |
| Glacial range contiguity          | 5.5%  | ≥ 0.86                  | ≥ 0.86                  |
| Modern range patch count          | 5.2%  | <36                     | ≥ 36                    |
| <hr/>                             |       |                         |                         |
